1  
2 **Nav1.1 is essential for proprioceptive signaling and motor behaviors**

3  
4  
5 Cyrrus M. Espino<sup>1</sup>, Cheyanne M. Lewis<sup>1</sup>, Serena Ortiz<sup>2</sup>, Miloni S. Dalal<sup>3</sup>, Snigdha Garlapalli<sup>4</sup>,  
6 Kaylee M. Wells<sup>5</sup>, Darik A. O'Neil<sup>5</sup>, Katherine A. Wilkinson<sup>2</sup>, and Theanne N. Griffith<sup>1,5\*</sup>

7  
8  
9 <sup>1</sup>*Department of Physiology and Membrane Biology, University of California Davis, Davis, CA,*  
10 *95616*

11 <sup>2</sup>*Department of Biological Science, San José State University, San José, CA, 95192*

12 <sup>3</sup>*Department of Pharmacology, Physiology, and Neuroscience, New Jersey Medical School-*  
13 *Rutgers University, Newark, NJ, 07103*

14 <sup>4</sup>*Undergraduate program in Psychology, University of California Davis, Davis, CA, 95616*

15 <sup>5</sup>*Neurobiology course, Marine Biological Laboratory Woods Hole, MA, 02540*

16  
17 \*Corresponding Author: Theanne N. Griffith  
18 1275 Med Science Drive  
19 Tupper Hall 4135  
20 Davis, CA 95616  
21 530.754.2780  
22 [\*\*tgriffith@ucdavis.edu\*\*](mailto:tgriffith@ucdavis.edu)

23  
24 Conflicts of Interest: None to declare  
25

26 **Acknowledgements:** This research was supported by a Postdoctoral Enrichment Program  
27 Award from the Burroughs Wellcome Fund (TNG) and by 5T32GM099608-10 and  
28 1T32GM1144303-01A1 (CME). Work at San José State was supported by NIGMS  
29 5SC3GM127195 (KAW) and NIGMS 5R25GM71381 (SO). Core facilities were supported by P30  
30 EY12576. Part of this project was carried out at the Marine Biological Laboratory Neurobiology  
31 Course, with support from NINDS R25NS063307. Thanks to Drs. Jon Sack and Xinzhong Dong  
32 for sharing mouse lines, Drs. Jorge Contreras and Ioana Carcea for sharing behavioral  
33 equipment, Miguel Gonzalez Fernandez for writing code to automate *ex vivo* data analysis, and  
34 members of the Griffith laboratory for helpful discussions.

---

36 **ABSTRACT**

37 The voltage-gated sodium channel ( $\text{Na}_v$ ),  $\text{Na}_v1.1$ , is well-studied in the central nervous system;  
38 conversely, its contribution to peripheral sensory neuron function is more enigmatic. Here, we  
39 identify a new role for  $\text{Na}_v1.1$  in mammalian proprioception. RNAscope analysis and *in vitro* patch  
40 clamp recordings in genetically identified mouse proprioceptors show ubiquitously channel  
41 expression and significant contributions to intrinsic excitability. Notably, genetic deletion of  $\text{Na}_v1.1$   
42 in sensory neurons caused profound and visible motor coordination deficits in conditional  
43 knockout mice of both sexes, similar to conditional Piezo2-knockout animals, suggesting this  
44 channel is a major contributor to sensory proprioceptive transmission. *Ex vivo* muscle afferent  
45 recordings conditional knockout mice found that loss of  $\text{Na}_v1.1$  leads to inconsistent and  
46 unreliable proprioceptor firing characterized by action potential failures during static muscle  
47 stretch; conversely, afferent responses to dynamic vibrations were unaffected. This suggests that  
48 while a combination of Piezo2 and other  $\text{Na}_v$  isoforms are sufficient to elicit activity in response  
49 to transient stimuli,  $\text{Na}_v1.1$  is required for transmission of receptor potentials generated during  
50 sustained muscle stretch. Impressively, recordings from afferents of heterozygous conditional  
51 knockout animals were similarly impaired, and heterozygous conditional knockout mice also  
52 exhibited motor behavioral deficits. Thus,  $\text{Na}_v1.1$  haploinsufficiency in sensory neurons impairs  
53 both proprioceptor function and motor behaviors. Importantly, human patients harboring  $\text{Na}_v1.1$   
54 loss-of-function mutations often present with motor delays and ataxia; therefore, our data suggest  
55 sensory neuron dysfunction contributes to the clinical manifestations of neurological disorders in  
56 which  $\text{Na}_v1.1$  function is compromised. Collectively, we present the first evidence that  $\text{Na}_v1.1$  is  
57 essential for mammalian proprioceptive signaling and behaviors.

58

## 59 INTRODUCTION

60 Voltage gated sodium channels (Navs) are critical mediators of neuronal excitability and are  
61 responsible for action potential generation and propagation (Ahern et al., 2016; Bean, 2007) . In  
62 the mammalian nervous system there are nine isoforms (Nav1.1-1.9), each with unique  
63 biophysical properties, as well as distinguishing cellular expression and subcellular localization  
64 patterns (Bennett et al., 2019; Catterall, 2017). Of these different subtypes, Nav1.1 is notable for  
65 its role in brain disease (Escayg and Goldin, 2010; Mulley et al., 2005; Ogiwara et al., 2007).  
66 Indeed, *Scn1a*, the gene that encodes Nav1.1, is referred to as a “super culprit” gene, with over  
67 1,000 associated mutations that lead to abnormal brain function, resulting in brain disorders such  
68 as epilepsy and migraine, as well as neurodivergent phenotypes, such as autism spectrum  
69 disorder (Ding et al., 2021; Lossin, 2009). Homozygous *Scn1a*<sup>-/-</sup> global knockout mice are ataxic  
70 and die by P15, while heterozygous *Scn1a*<sup>+/-</sup> animals develop seizures and begin to die  
71 sporadically starting at P21 (Yu et al., 2006). In addition to the central nervous system, Nav1.1 is  
72 also expressed in the peripheral nervous system (Sharma et al., 2020; Usoskin et al., 2015); yet,  
73 the prominent role this channel plays in brain function has left its physiological roles in sensory  
74 neuron populations understudied.

75         Peripheral sensory neurons of the dorsal root and trigeminal ganglia (DRG and TG,  
76 respectively) are tasked with encoding somatic sensations, such as touch, temperature, pain, and  
77 proprioception, and are anatomically and functionally heterogenous (Kupari et al., 2021; Nguyen  
78 et al., 2021; Oliver et al., 2021a; Wu et al., 2021). *Scn1a* transcript and protein have been  
79 observed primarily in myelinated mechanosensory DRG and TG neurons (Fukuoka et al., 2008;  
80 Ho and O’Leary, 2011; Osteen et al., 2016). Indeed, subcutaneous injection of the Nav1.1  
81 activator, Hma1, into mouse hind paw causes non-inflammatory mechanical pain and  
82 spontaneous pain behaviors (Osteen et al., 2016). Interestingly, pharmacological inhibition of  
83 Nav1.1 does not affect mechanical thresholds in uninjured mice but does reduce mechanical pain

84 in a spared-nerve injury model (Salvatierra et al., 2018), suggesting Nav1.1 may have a more  
85 prominent role in mechanical pain as opposed to normal touch sensing. Nav1.1 in TG neurons  
86 has also been reported to mediate mechanical pain in an orbitofacial chronic constriction injury  
87 model (Pineda-Farias et al., 2021). In addition to somatosensory neurons, Nav1.1 is found in  
88 colon-innervating vagal neurons, where it contributes to firing of colonic mechano-nociceptors  
89 and is upregulated in a mouse model of chronic visceral hypersensitivity (Osteen et al., 2016;  
90 Salvatierra et al., 2018). Lastly, Nav1.1 contributes to action potential firing in a subset of DRG  
91 neurons that express the cold sensitive ion channel, transient receptor potential melastatin 8  
92 (TRPM8), suggesting the channel may also contribute to thermosensory transmission (Griffith et  
93 al., 2019). While most data support a role for Nav1.1 in pain, the limited number of studies that  
94 have investigated Nav1.1 function in sensory neurons has left gaps in our knowledge regarding  
95 other potential roles this channel may play in somatosensation.

96         Given the relatively under-explored role of Nav1.1 in the peripheral nervous system, we  
97 set out to determine what other somatosensory modalities rely on Nav1.1 expression in sensory  
98 neurons. Here, we show that 100% of proprioceptors express *Scn1a* mRNA, where it makes  
99 notable contributions to the somal whole-cell sodium current and intrinsic excitability. A functional  
100 role for Nav1.1 in proprioceptive signaling was also supported by *ex-vivo* electrophysiological  
101 recordings from functionally identified muscle spindle afferents. Importantly, mice lacking Nav1.1  
102 in all sensory neurons display visible and profound motor deficits and ataxic-like behavior, which  
103 were quantified in rotarod and open field assays. Surprisingly, we found Nav1.1 is haploinsufficient  
104 for normal proprioceptor function and behavior, in *ex vivo* recordings and the open field assay,  
105 respectively. Collectively, our data provide the first evidence that peripherally expressed Nav1.1  
106 is critical for sensory proprioceptive signaling and motor coordination.

107

108 **RESULTS**

109 Most studies have localized Nav1.1 expression primarily to myelinated sensory neurons  
110 that transmit mechanical signals (Fukuoka et al., 2008; Ho and O'Leary, 2011; Osteen et al.,  
111 2016b; Wang et al., 2011). In line with prior work, RNAscope analysis of DRG sections from adult  
112 mice showed that 93% of myelinated neurons, as determined by neurofilament heavy chain (NFH)  
113 labeling, express *Scn1a* transcripts (**Fig 1A**). RNA-sequencing datasets have consistently  
114 identified Nav1.1 expression in proprioceptors; thus, we next analyzed Nav1.1 expression in these  
115 cells using a Parvalbumin<sup>Cre</sup>;Rosa26<sup>Ai14</sup> reporter line (*Pvalb*<sup>Ai14</sup>) and found 100% of genetically  
116 identified proprioceptors were positive for *Scn1a* message (**Fig 1B**). This contrasted with low  
117 expression of *Scn1a* mRNA in both calcitonin gene related peptide (CGRP) expressing neurons,  
118 which represent peptidergic nociceptors, and non-peptidergic polymodal *Mrgprd*-expressing  
119 nociceptors (24% and 3%, respectively, **Fig 1C-D**). Frequency and cumulative distribution plots  
120 show the spread of integrated fluorescence density measurements obtained for *Scn1a* transcripts  
121 in proprioceptors (**Fig 1E-F**).

122

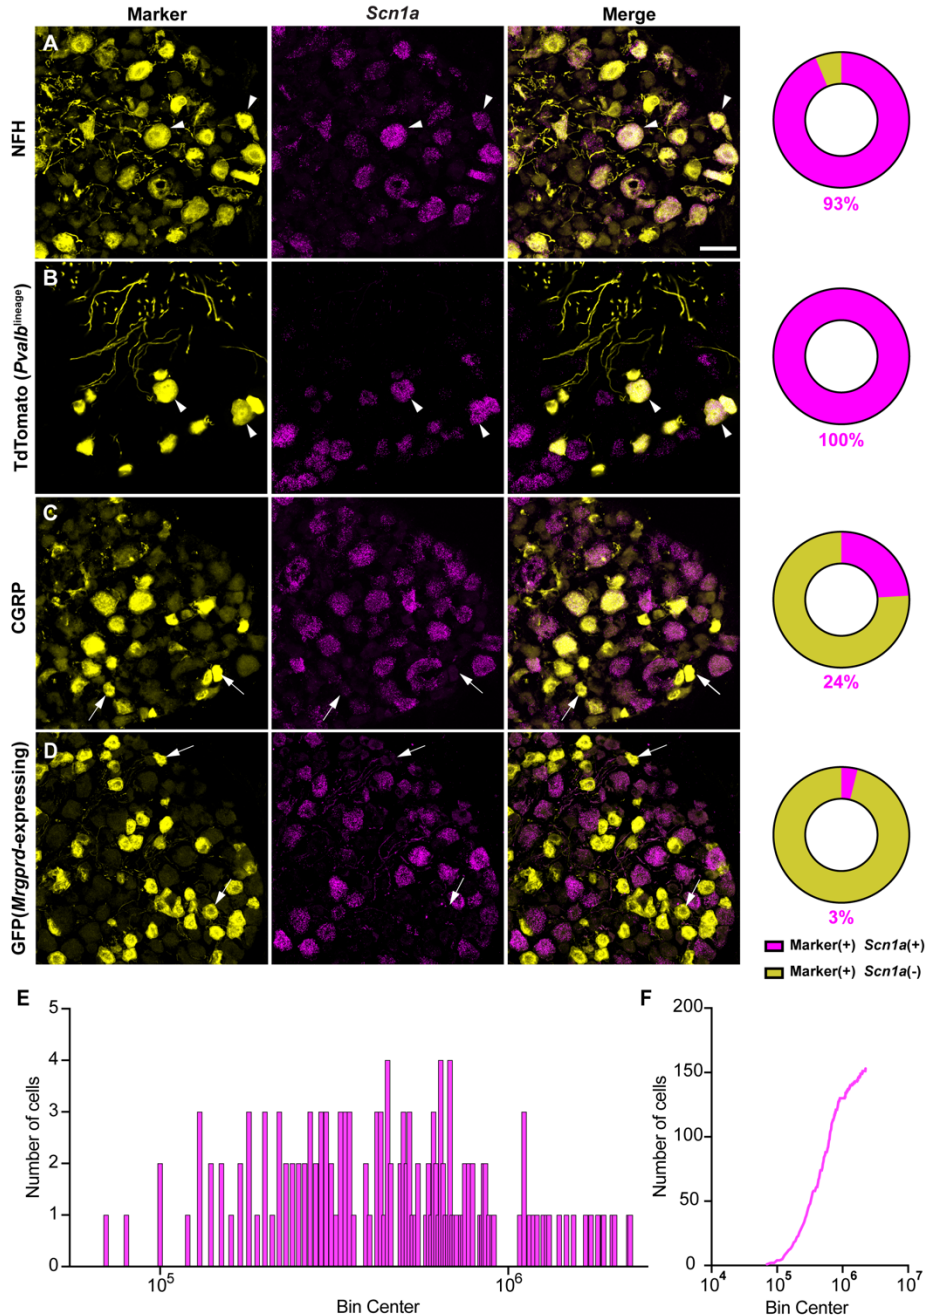

123

124

125 **Figure 1. Nav1.1 is ubiquitously expressed in genetically identified proprioceptors.** A-D, Representative confocal  
 126 images of cryoprotected adult DRG sections (25  $\mu$ m) with pie chart quantifications indicating the percentage of *Scn1a*+  
 127 and *Scn1a*- neurons in each subpopulation (magenta and yellow, respectively). Images were acquired with a 40X, 0.9  
 128 NA water-immersion objective. Sections were hybridized using RNAscope with probes targeting *Scn1a* (*Scn1a*,  
 129 magenta) and stained with the following antibodies (yellow): (A) anti-neurofilament heavy (NFH, n=787) (B) anti-DsRed  
 130 to label TdTomato+ proprioceptors (n=143) (C) anti-calcitonin gene-related peptide (CGRP, n=877) and (D) anti-GFP  
 131 to label *Mrgprd*+ neurons. DRG from C57BL/6, *Pvalb*<sup>Cre</sup>; *Rosa26*<sup>Ai14</sup>, and *Mrgprd*<sup>GFP</sup> mice of both sexes were used.  
 132 Scale bar 50 $\mu$ m. White arrowheads indicate *Scn1a* + neurons while white arrows indicate *Scn1a* - neurons. Frequency

133 (E) and cumulative (F) distribution plots of integrated fluorescence density of the *Scn1a* signal in TdTomato+  
134 proprioceptors (n=153). n = cells.  
135 In addition to Nav1.1, Nav1.6 and Nav1.7 expression has also been reported in proprioceptors  
136 (Carrasco et al., 2017). As with *Scn1a*, mRNA for *Scn8a* and *Scn9a* is also found in 100% of genetically  
137 identified proprioceptors (Fig 2A-B). Cumulative distribution plots of *Scn8a* and *Scn9a* integrated  
138 fluorescence density measurements showed higher variability as compared to Nav1.1 (Fig 2C-D, Fig  
139 1E). This was quantified using the coefficient of variation, a relative measure of the extent of variations  
140 within data. The coefficient of variation for *Scn1a* transcript expression was calculated to be 75.6,  
141 whereas this value increased to 97.3 and 88.1 for *Scn8a* and *Scn9a*, respectively. This indicates that  
142 while all three isoforms are ubiquitously expressed in proprioceptors, the relative levels differ, with Nav1.1  
143 having the most consistent level of expression across neurons analyzed. Furthermore, the average  
144 integrated density of the Nav1.1 signal for a given proprioceptive DRG neuron was significantly higher  
145 than both Nav1.6 and Nav1.7 (Fig 2E,  $p < 0.0001$ ).

146 Due to the ubiquitous expression of Nav1.1, Nav1.6, and Nav1.7 in proprioceptors, we  
147 sought to determine the relative contributions of these isoforms to the proprioceptor whole-cell  
148 sodium current ( $I_{Na}$ ). We performed *in vitro* voltage-clamp experiments on TdTomato+ neurons  
149 harvested from thoracic spinal levels of adult *Pvalb*<sup>Ai14</sup> mice (de Nooij et al., 2013) and used serial  
150 application of selective Nav channel antagonists to determine the specific contributions of Nav1.1,  
151 Nav1.6, and Nav1.7 (Fig 2F). We first applied the selective Nav1.1 antagonist ICA 1214314 (ICA,  
152 500 nM), followed by 9-Anhydroustetrodoxin (AH-TTX, 300 nM), which is a selective Nav1.6  
153 blocker but also partially blocks Nav1.1 (Denomme et al., 2020; Griffith et al., 2019). We reasoned  
154 that by first blocking the Nav1.1 mediated current, the effect of AH-TTX should largely be due to  
155 inhibition of Nav1.6. Finally, we blocked Nav1.7 channels using the antagonist PF-05089771 (25  
156 nM), followed by tetrodotoxin (TTX, 300 nM) to block any residual current, as proprioceptors do  
157 not express TTX-resistant Navs. On average, 7.8% of the current remained unblocked following  
158 serial application of these antagonists due to incomplete block by the drugs used. We found that  
159 the ICA-sensitive component of  $I_{Na}$  was 44.8% of the total current. Conversely, 14.5% and 32.9%

160 of  $I_{Na}$  was sensitive to AH-TTX and PF-05089771, respectively (**Fig 2G**). No significant effect of  
 161 the 0.1% DMSO vehicle solution on  $I_{Na}$  amplitude was observed (**Fig 2 – figure supplement 1**).  
 162 Collectively, these data suggest that in proprioceptors  $Na_V1.1$  is a dominant functional  $Na_V$

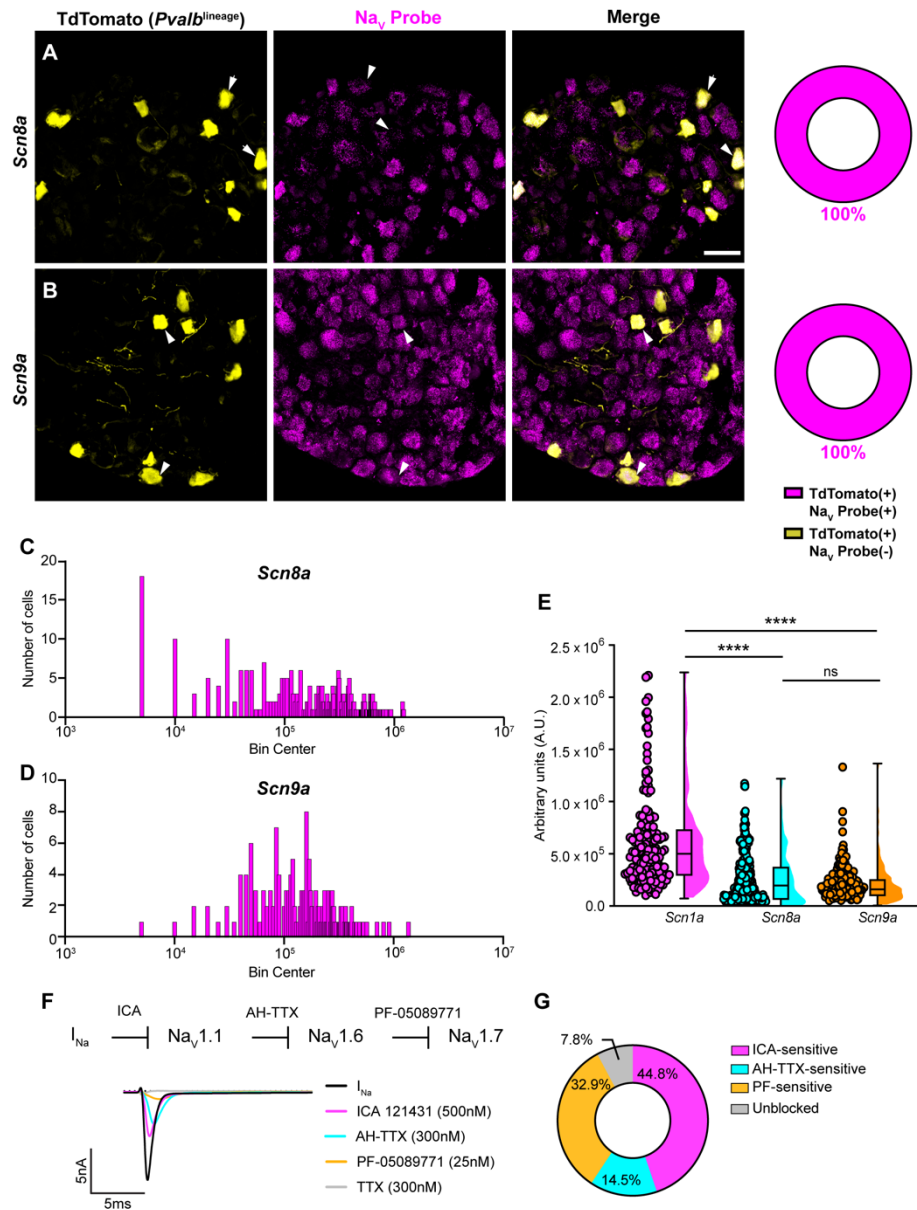

163 subtype.

164

165 **Figure 2. Transcriptomic and functional expression of sodium channels in proprioceptors.** **A-B.** Representative  
 166 confocal images of cryoprotected adult DRG sections (25  $\mu$ m) with quantifications indicating the percentage of  $Na_V$ +  
 167 and  $Na_V$ - neurons in TdTomato+ proprioceptors. Sections were hybridized using RNAscope with probes targeting  
 168  $Na_V1.6$  or  $Na_V1.7$  (*Scn8a* and *Scn9a*, respectively, magenta) and stained with anti-DsRed (yellow). **(A)** *Scn8a*, n=298,  
 169 **(B)** *Scn9a*, n=166. Scale bar set to 50 $\mu$ m. White arrowheads indicate  $Na_V$ + neurons. **C-D.** Frequency distribution plots  
 170 of integrated fluorescence density of  $Na_V1.6$  and  $Na_V1.7$  mRNA in TdTomato+ proprioceptors, respectively. **E.** The



171 average integrated density of *Scn1a*, *Scn8a*, and *Scn9a* RNAscope probe signal. Dots represent individual cells.  
172 Statistical significance was determined using a Kruskal-Wallis test with Dunn's post hoc comparisons. **F.** Top,  
173 experimental workflow of serial pharmacological blockade of Nav channels expressed in proprioceptors. We first elicited  
174 a whole-cell sodium current in the absence of drug. We next bath applied 500nM of ICA 121431 to block current carried  
175 by Nav1.1. Subsequently, we bath applied AH-TTX (300nM) to block Nav1.6 mediated current, and PF-05089771  
176 (25nM) to block the Nav1.7 mediated current. Finally, TTX (300nM) was used to block residual current and to confirm  
177 there was no contribution of TTX-resistant Navs in proprioceptors. Bottom, representative current traces following  
178 application of Nav selective inhibitors. All drugs were applied for 1 minute. **(G)** Quantification of the average percentage  
179 of the whole-cell sodium current that was sensitive to the individual drugs used (n=8). n = cells. \*\*\*\*p<0.0001.

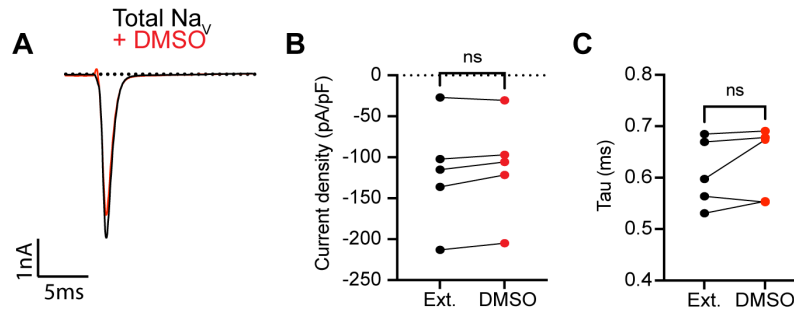

181 **Figure supplement 1. 0.1% DMSO vehicle does not change I<sub>Na</sub> in proprioceptors.** (A) Representative current trace  
182 before (black trace) and after (red trace) application of 0.1% DMSO to TdTomato+ proprioceptors during *in vitro*  
183 electrophysiological experiments. Quantification of current density (B) and current decay kinetics (C) before (normal  
184 external solution) and after DMSO application. A paired t-test was used to determine statistical significance (p = 0.0855,  
185 n = 5 cells).  
186

187  
188 We next determined the biophysical features of the whole-cell sodium current (I<sub>Na</sub>) in  
189 proprioceptors, which has not been previously reported (Fig 3A-D). The current-voltage  
190 relationship shows the first detectable current appeared at voltages near -50 mV and was maximal  
191 at voltages near -30 mV when evoked from a holding potential of -90 mV (Fig 3B). Voltage  
192 dependence of peak conductance was best fit to a single Boltzmann function and the voltage for  
193 half maximal activation was -38.7 mV (Fig 3C). The voltage-dependence of inactivation was  
194 determined with 40 ms prepulse steps ranging from -120 mV to +10 mV. The midpoint of the  
195 inactivation curve was -64.5 mV and was best fit to a single Boltzmann function (Fig 3D). To  
196 analyze recovery from fast inactivation, TdTomato+ neurons were depolarized to -20 mV, followed  
197 by a series of recovery periods ranging from 0.5 ms to 10 ms before a second test step to -20 mV  
198 was given to assess sodium channel availability. I<sub>Na</sub> recovery was rapid (τ = 0.54 ms), with greater  
199 than 50% of I<sub>Na</sub> recovered after 0.5 ms (Fig 3E). Finally, entry into slow inactivation was  
200 determined. Cells were held at 0 mV during conditioning voltage steps ranging from 10 ms to  
201 2000 ms, separated by two 2-ms pulses to -20 mV to compare channel availability before and

202 after the conditioning pulse (**Fig 3F**). The tau for entry into slow inactivation was 928.6 ms, with  
203 more than 50% of channels available after a 2000 ms conditioning pulse.

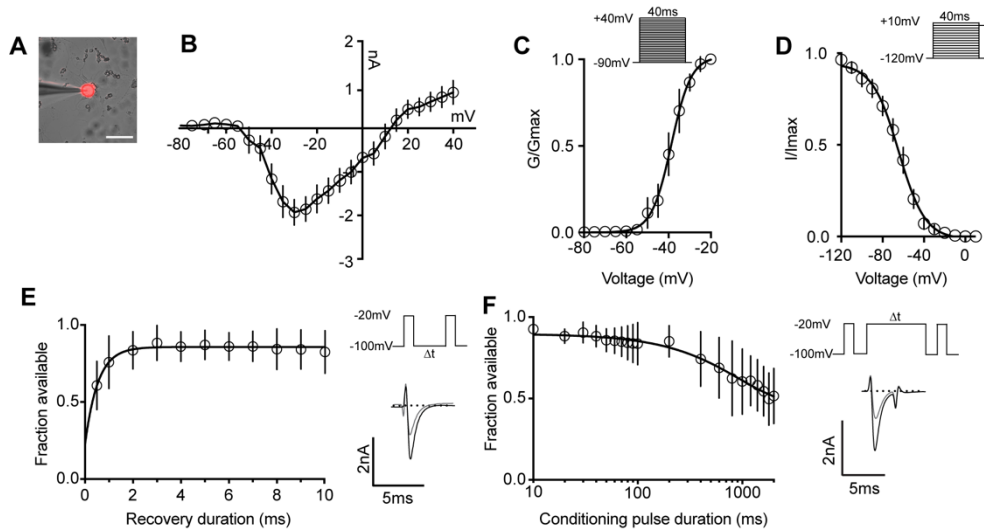

204 **Figure 3. Biophysical analysis of the whole-cell sodium current ( $I_{Na}$ ) in genetically identified proprioceptors.**  
205 **(A)** Representative image of a TdTomato+ proprioceptor in culture during electrophysiological recordings (scale bar set  
206 to 50 $\mu$ m). **(B)** Current-voltage relationship of  $I_{Na}$  from TdTomato+ proprioceptors. Currents were elicited by 40 ms  
207 voltage steps from -90 mV to +40 mV in 5 mV increments (n=7-9). **(C)** Top, the voltage protocol used to measure the  
208 voltage dependence of for whole-cell sodium current activation in proprioceptors. Currents were elicited using a series  
209 of 40 ms voltage steps from -90 mV to 40 mV at 5 mV increments from a holding potential of -90 mV. Data are expressed  
210 as conductance over maximum conductance (n=6-9). **(D)** Top, the voltage protocol used to measure the voltage  
211 dependence of inactivation. A 40 ms prepulse ranging from -120mV to +10mV was given followed by a test pulse to 0  
212 mV. Data are expressed as current over maximum current (n=8-12). **(E)** Left, quantification of recovery from fast  
213 inactivation (n=8). Line shows a monoexponential fit of the data ( $\tau=0.54$  ms). Top right, voltage-protocol to measure  
214 recovery from fast inactivation. A 20 ms step to -20 mV from -100 mV is followed by varying durations of recovery at  
215 -100 mV before a second test step to -20 mV. Bottom right, representative traces of currents elicited before (black trace)  
216 and after (grey trace) a 0.5 ms recovery period. **(F)** Left, quantification of entry into slow inactivation (n=6). Line shows  
217 a monoexponential fit of the data ( $\tau=928.6$  ms). Top right, voltage-protocol to measure entry into slow inactivation.  
218 A 3 ms test pulse to -20mV from -100mV was followed by conditioning pulses at 0 mV for varying durations before a third  
219 test step to -20mV. 12 ms recovery periods after the first test pulse and before the second were included to remove  
220 fast inactivation. Bottom right, representative current trace elicited before and after a 2000 ms conditioning pulse. n =  
221 cells.

222  
223 We next asked how blocking  $Na_v1.1$  channels affects proprioceptor function *in vitro*.

224 Similar to serial pharmacological experiments,  $I_{Na}$  density in proprioceptors was significantly  
225 reduced from  $\sim$ 140 pA/pF to  $\sim$ 75 pA/pF following ICA application (**Fig 4B**,  $p = 0.0003$ ). The  
226 proprioceptor  $I_{Na}$  had an average tau of 0.6 ms, which was significantly slowed to 1.0 ms following  
227 application of ICA (**Fig 4C**,  $p = 0.0007$ ), in line with loss of a fast gating channel. Blocking  $Na_v1.1$   
228 did not change  $I_{Na}$  rise time (**Fig 4D**,  $p = 0.1611$ ). Quantification of the ICA-sensitive component  
229 found an average tau of 0.4 ms and an average current density of -96 pA/pF (**Fig 4E**). Of note,  
230 there was a wide distribution of current densities for the ICA-sensitive component, ranging from

231  $\sim$ -28 pA/pF to  $\sim$ -263 pA/pF, suggesting some variability in the contribution of Nav1.1 to  
 232 proprioceptor excitability that may be proprioceptor subtype dependent. We next used current  
 233 clamp experiments to determine the effect of ICA on proprioceptor intrinsic excitability (**Fig 4F**).  
 234 Pharmacological inhibition of Nav1.1 significantly reduced the number of evoked action potentials  
 235 in most genetically identified proprioceptors (**Fig 4G**); however, 5 of the cells recorded had low  
 236 firing rates that were not inhibited by ICA. This further suggests Nav1.1 is important for repetitive  
 237 firing in most proprioceptors, but some subtypes with lower intrinsic excitability instead rely on a  
 238 combination of Nav1.6 and Nav1.7. Action potential amplitude (**Fig 4H**,  $p = 0.0420$ ) and action  
 239 potential threshold (**Fig 4I**,  $p = 0.0186$ ) were also significantly reduced following ICA application,  
 240 and action potential full-width half-max was significantly increased following ICA application (**Fig**  
 241 **4K**,  $p = 0.0068$ ), in line with loss of the fast Nav1.1-mediated current.  
 242

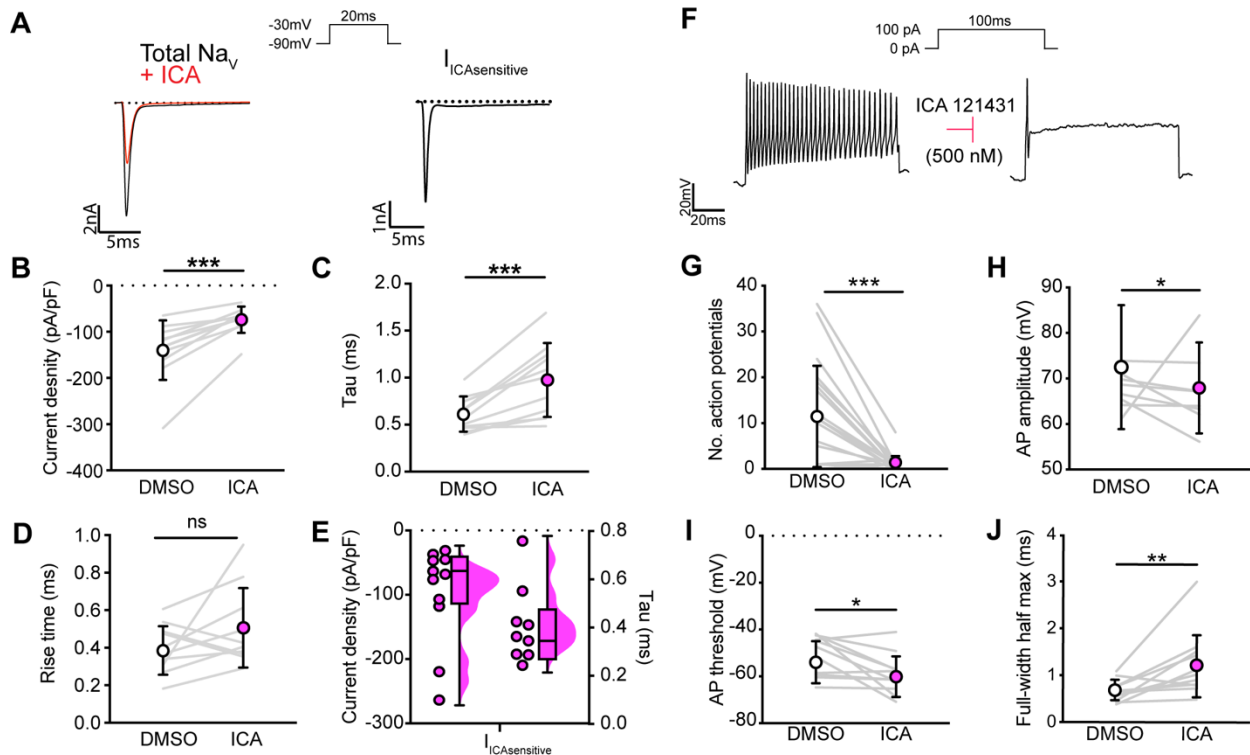

244 **Figure 4. Nav1.1 significantly contributes to the whole-cell sodium current and intrinsic excitability in**  
 245 **genetically identified proprioceptors.** **A.** Left, representative whole-cell voltage-clamp traces elicited before (black)  
 246 and after (red) application of ICA121431 (500nM). Right, the subtracted ICA-sensitive current shown in black. **B.**

247 Quantification of the reduction in whole-cell current density before (white) and after (magenta) ICA,  $p = 0.0003$ ,  $n=11$   
248 cells. **C.** Quantification of rate of current decay before and after ICA,  $p = 0.0007$ ,  $n=11$  cells. **D.** Quantification of whole-  
249 cell current rise time before and after ICA,  $p = 0.1611$ ,  $n=10$  cells. **E.** Left, current densities of ICA-sensitive sodium  
250 currents ( $n=11$ ), right, current decay taus of ICA-sensitive sodium currents ( $n=9$  cells). **F.** Representative whole-cell  
251 current clamp traces before (left) and after (right) application of ICA. **G-J.** Quantification of number of action potentials  
252 in response to current injection (**G**,  $p = 0.0002$ ,  $n=20$  cells), action potential amplitude (**H**,  $p = 0.0420$ ,  $n=20$  cells), action  
253 potential threshold (**I**,  $p = 0.0186$ ,  $n=20$  cells), and full-width half max (**J**,  $p = 0.0068$ ,  $n=20$  cells). Grey lines represent  
254 paired observations, circles and lines represent means and standard deviations. White circles, before ICA application.  
255 The Wilcoxon matched-pairs signed rank test was used to determine statistical significance.

256 It is important to note that ICA 121431 also blocks  $Na_v1.3$  channels, which could be  
257 upregulated in our cultured DRG neuron preparations (Wangzhou et al., 2020). Indeed, a small  
258 but significant decrease in  $I_{Na}$  was observed in recordings from large-diameter DRG neurons  
259 harvested from *Pirt<sup>Cre</sup>;Scn1a*-floxed mice (*Scn1a*-cKO), which lack  $Na_v1.1$  in all sensory neurons.  
260 Thus, inhibition of upregulated  $Na_v1.3$  channels could contribute to the effect of on ICA on the  
261 proprioceptor  $I_{Na}$  (**Fig 4 - figure supplement 2**).

262

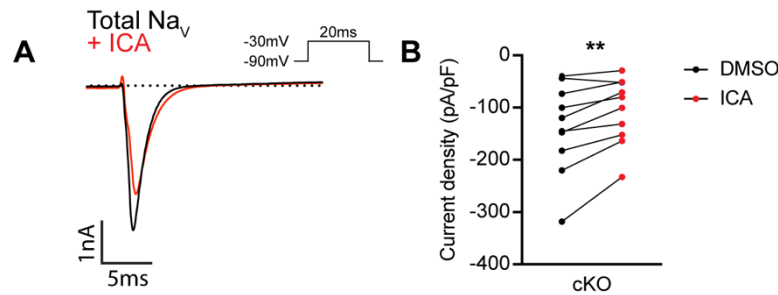

263 **Figure supplement 2. ICA121431 may inhibit upregulated  $Nav1.3$  channels in cultured DRG neurons. (A)** and  
264 Representative whole-cell current trace from a large diameter DRG neurons ( $>60pF$ ) from a *Scn1a*-cKO mouse. The  
265 black trace represents the  $I_{Na}$  recorded in external solution and the red trace represents the current following application  
266 of 500nM of ICA121431 for 1 minute. **(C)** Quantification of the current density before and after ICA ( $n=9$ ). A significant  
267 effect of ICA was found (Paired student's t test,  $p = 0.0041$ ).  $n =$  cells.  
268

269 To clarify the importance of  $Na_v1.1$  to proprioceptor function and avoid the caveats  
270 associated with *in vitro* pharmacological studies, we took an *in vivo* approach and analyzed motor  
271 behaviors in *Scn1a*-cKO mice of both sexes. We were precluded from using a *Pvalb<sup>cre</sup>* driver line  
272 to directly interrogate a role for  $Na_v1.1$  in proprioceptors, as loss of  $Na_v1.1$  in *Pvalb*-expressing  
273 brain interneurons produces an epilepsy phenotype that prevents behavioral analyses in adult  
274 animals (Ogiwara et al., 2007). Consistent with *in vitro* data, *Scn1a*-cKO animals of both sexes  
275 displayed profound and visible motor abnormalities. These abnormalities include ataxic-like

276 tremors when suspended in the air (**Fig 5 - video 1**), abnormal limb positioning (**Fig 5 -videos 2-**  
277 **3**), and paw claspings, which are absent in Scn1a-floxed littermate controls and heterozygous  
278 animals (*Pirt<sup>Cre</sup>;Scn1a<sup>fl/+</sup>*, Scn1a-Het, respectively, **Fig 5A**). We first ran animals in the open field  
279 test for ten minutes each to quantify spontaneous locomotor behaviors (**Fig 5B**). We found that  
280 Scn1a-cKO animals traveled significantly less (**Fig 5C**) and slower (**Fig 5D**) than Scn1a-floxed  
281 littermate controls ( $p = 0.0077$  and  $0.0057$ , respectively). Surprisingly, Scn1a-Het mice also  
282 displayed motor abnormalities in the open field test, performing similarly to Scn1a-cKO animals  
283 (**Fig 5B-D**), demonstrating Nav1.1 haploinsufficiency in sensory neurons for motor behaviors. No  
284 genotype-dependent differences were observed in the amount of time spent moving, suggesting  
285 gross motor function was intact (**Fig 5E**). Additionally, the amount of time spent in the center of  
286 the open field chamber was also independent of genotype (**Fig 5F**). We next used the rotarod  
287 assay to investigate differences in motor coordination. Mice were assayed on three consecutive  
288 days and latency-to-fall and RPM were quantified. Unlike in the open field assay, both Scn1a-  
289 floxed and Scn1a-Het mice performed at similar levels during the three-day period (**Fig 5G-H**).  
290 Conversely, Scn1a-cKO animals performed significantly worse. By day 3, on average they were  
291 only able to maintain their position on the rotarod for 41 s, falling over 50% faster Scn1a-floxed  
292 and Scn1a-Het mice. We did not observe any sex dependent differences in performance in the  
293 open field or rotarod tests (**Fig 5 - figure supplement 3**). We confirmed that our mouse model  
294 selectively targeted sensory neurons by crossing a *Pirt<sup>Cre</sup>* driver with a fluorescent reporter line  
295 (*Pirt<sup>Cre</sup>;Rosa26<sup>Ai14</sup>*). We observed little-to-no neuronal expression of TdTomato in both dorsal and  
296 ventral spinal cord (**Fig 5 - figure supplement 4**). In contrast, DRG somata and axons showed  
297 strong labeling. Collectively, our behavioral data provide evidence for a new *in vivo* role of Nav1.1  
298 in sensory neurons in mammalian proprioception.

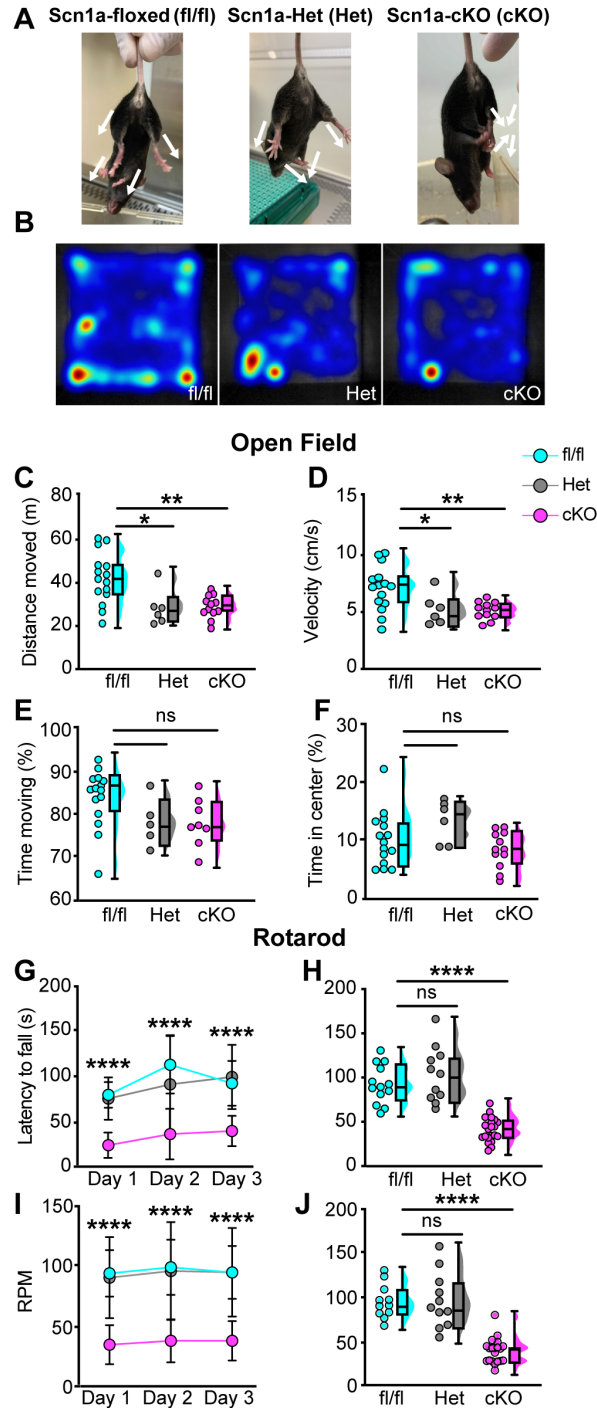

299

300 **Figure 5. Loss of Nav<sub>1.1</sub> in peripheral sensory causes deficits in motor behaviors.** **A.** Representative images  
 301 showing limb positions of adult Scn1a-floxed (left), Scn1a-Het (middle), and Scn1a-cKO (right) mice. White arrows  
 302 represent the direction of limbs. **B.** Representative heat maps from open field experiments between Scn1a-floxed (left),  
 303 Scn1a-Het (middle), and Scn1a-cKO (right). **Open Field (C-F),** Quantification of total distance traveled during a 10-  
 304 minute open-field test between Scn1a-floxed (cyan), Scn1a-Het (grey), and Scn1a-cKO (magenta) mice (**C**, Scn1a-Het  
 305  $p = 0.0255$ , Scn1a-cKO,  $p = 0.0077$ , compared to Scn1a-floxed), average animal velocity (**D**, Scn1a-Het  $p = 0.00311$ ,  
 306 Scn1a cKO,  $p = 0.0057$ , compared to Scn1a-floxed), percent time moving (**E**, Scn1a-Het  $p = 0.1362$ ,  $p = 0.0730$ ,  
 307 compared to Scn1a-floxed), and percent time spent in center (**F**, Scn1a-Het  $p = 0.2297$ , Scn1a-cKO,  $p = 0.2494$ ,

308 compared to Scn1a-floxed) during the test. Rotarod (**G-I**), Quantification of the latency to fall across three consecutive  
 309 training days (**G**) and the day-three (**H**). Quantification of revolutions per minute (RPM) at the moment of animal fall (**I**)  
 310 and the day-three average (**J**). Each dot represents one animal. \*\*\*\* $p < 0.0001$ . A one-way ANOVA (Dunnett's post  
 311 hoc comparison) was used to determine statistical significance in **C-F** and **I** and **J**. A two-way mixed-design ANOVA  
 312 (Dunnett's post hoc comparison) was used to determine statistical significance in **G** and **H**. Open field: Scn1a-floxed  
 313 N=15, Scn1a-Het N=6, Scn1a-cKO N=12. Rotarod: Scn1a-floxed N=11, Scn1a-Het N=11, Scn1a-cKO N=20.  
 314

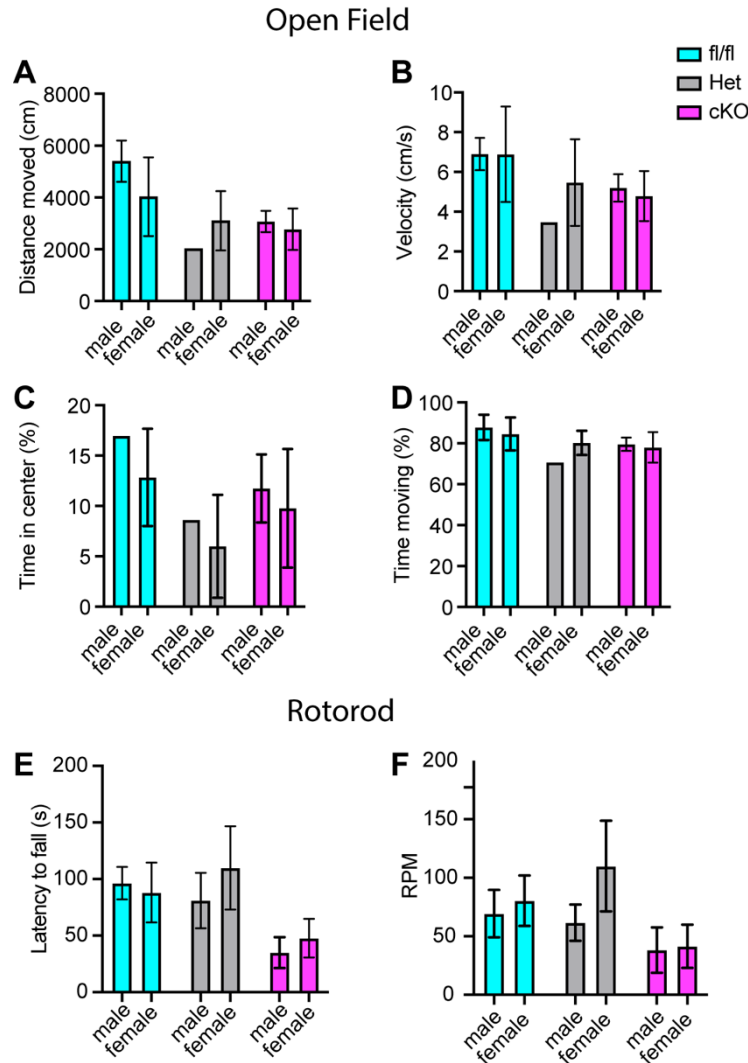

315

316 **Figure supplement 3. Motor deficits in Scn1a-Het and Scn1a-cKO animals are not sex dependent. A-D.**  
 317 Quantification of sex-dependent parameters during a 10-minute open field trial. Total distance moved (**A**). Velocity (**B**).  
 318 Percent time spent in center of box (**C**). Total percent time moving (**D**). Quantification of the sex-dependent differences  
 319 in rotarod day-three trial latency to fall (**E**) and RPM (**F**).

320

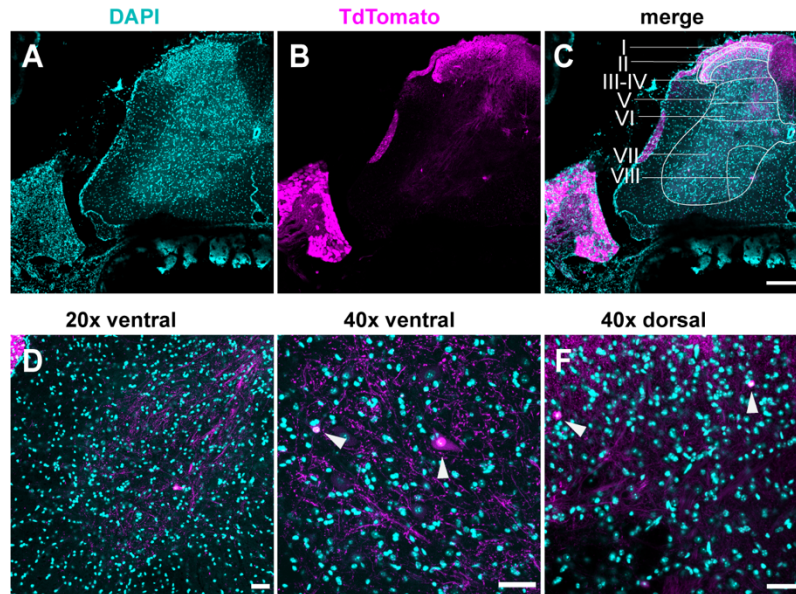

321 **Figure supplement 4. TdTomato expression is limited to sensory neurons.** A-D, Images stained using  
322 immunohistochemistry with anti-DsRed (TdTomato) (A-C) Representative confocal images of spinal cord sections at  
323 10X, 0.45 NA dry objective. Scale bar 200 $\mu$ m. (D) Image was taken at 20X, 0.8 NA dry objective of the ventral horn.  
324 (E) Image was taken at 20X, 0.8 NA dry objective of the dorsal horn. Scale bar 50 $\mu$ m. (F) Image was taken at 40X, 1.3  
325 NA oil-immersion objective. Arrows indicate TdTomato+ puncta. Scale bar 50 $\mu$ m. (N=3, n=30 sections).  
326  
327

328

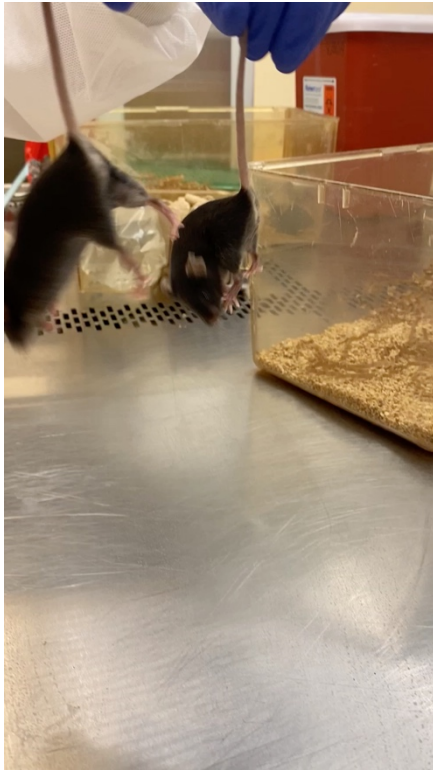

**Video 1. Uncoordinated movements in Scn1a-cKO animals.** A Scn1a-cKO mouse (left) shows abnormal and spastic movements when suspended in the air. These movements are absent in Scn1a-floxed mice (right).



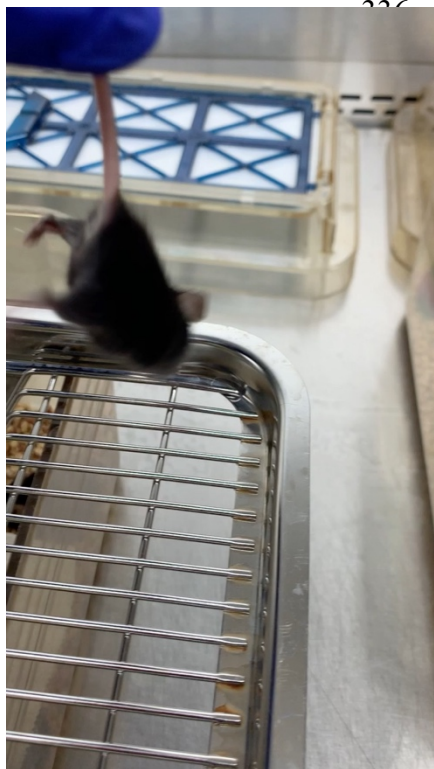

**Video 2. Abnormal limb position in Scn1a-cKO animals.** A Scn1a-cKO mouse has uncoordinated leg movements and makes an abnormal rotation of its hind paw to grasp its tail while suspended in the air.

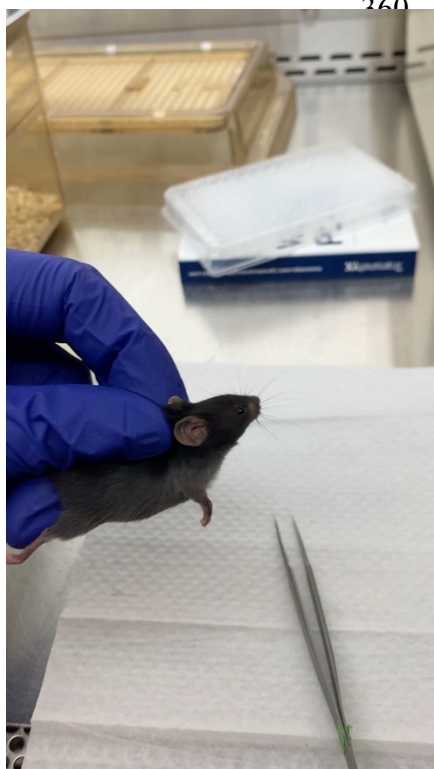

**Video 3. Abnormal paw position in Scn1a-cKO animals.** A Scn1a-cKO mouse is scruffed and places hind paws with foot pads facing down. This contrasts with the normal paw positioning seen in the forepaws, in which foot pads are in the outward facing position.

367            Could the motor deficits observed in Scn1a-cKO mice be due to abnormal proprioceptor  
368 development? To address this question, we performed RNAscope analysis of DRG sections from  
369 Scn1a-floxed, Scn1a-Het, and Scn1a-cKO mice. We quantified the number of neurons per DRG  
370 section that were positive for both *Runx3* and *Pvalb* transcript, the molecular signature of mature  
371 proprioceptors (**Fig 6**, Oliver et al., 2021). We found no significant genotype-dependent  
372 differences in the number of proprioceptors in Scn1a-Het and Scn1a-cKO mice compared to  
373 Scn1a-floxed controls ( $p = 0.3824$  and  $p = 0.1665$ , respectively), indicating that the behavioral  
374 deficits observed in Scn1a-cKO mice are not the result of a developmental loss of proprioceptors.  
375 We also analyzed muscle spindle morphology to determine if aberrant sensory end organ  
376 development may contribute to the observed motor abnormalities. Similar to conditional Piezo2-  
377 knockout animals (Woo et al., 2015), no qualitative differences were observed between genotypes  
378 (**Fig 6 - figure supplement 5**). Thus, abnormal proprioceptor development does not contribute  
379 to the overall phenotype of Scn1a-cKO mice.

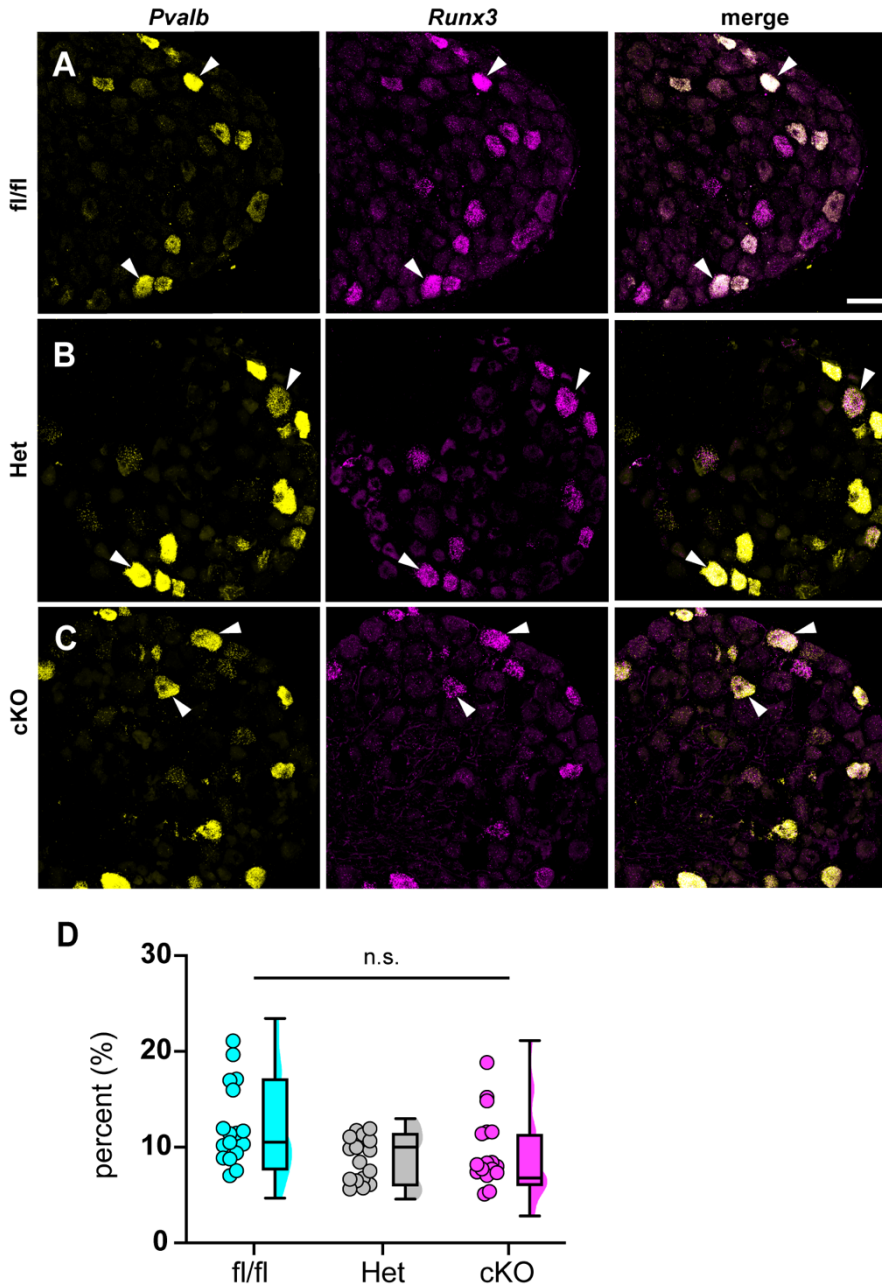

380

381 **Figure 6. Loss of Nav1.1 in sensory neurons does not affect proprioceptor development.** Representative images  
382 of Scn1a-floxed (A), Scn1a-Het (B), and Scn1a-cKO (C) adult DRG neuron sections (25  $\mu$ m). Images were acquired  
383 with a 40X, 0.9 NA water-immersion objective. Sections were hybridized with probes targeting parvalbumin (*Pvalb*,  
384 yellow) and *Runx3* (magenta). (D) Quantification of the percentage of *Pvalb*+/*Runx3*+ neurons in each genotype. Each  
385 dot represents one DRG section. A Kruskal-Wallis test with Dunn's post hoc comparison was used to determine  
386 statistical significance ( $p = 0.1971$ , Scn1a-floxed  $n=17$ , Scn1a-Het  $n=17$ , Scn1a-cKO  $n=18$ ). Scale bar 50 $\mu$ m.  
387

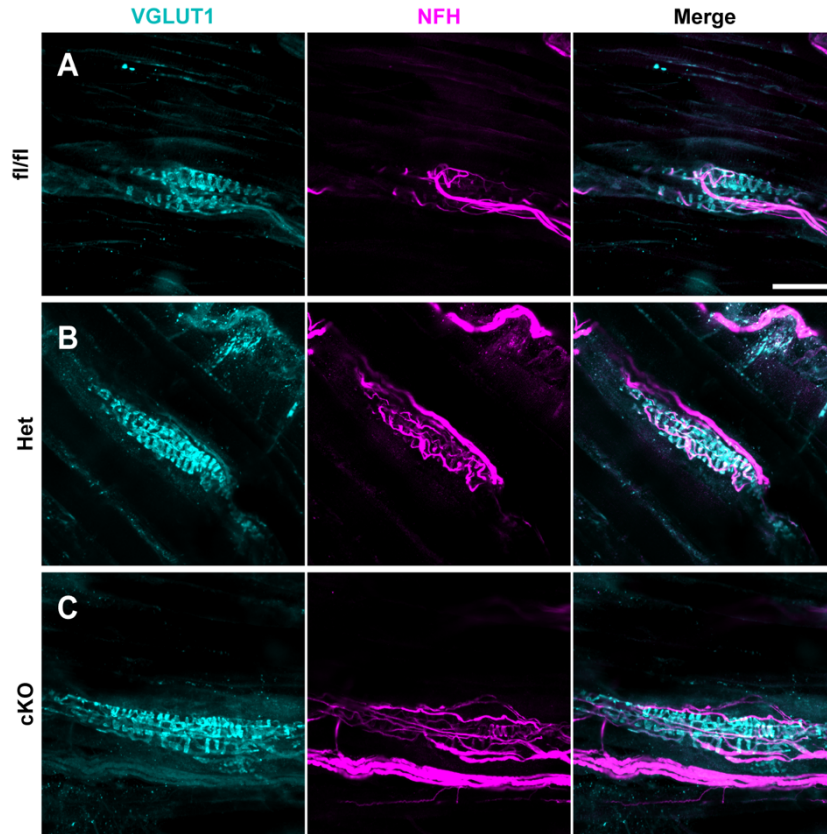

388

389 **Figure supplement 5. Muscle spindle development is normal in Scn1a-Het and Scn1a-cKO animals. A-C,**  
390 **Representative confocal images of muscle spindle whole mounts. Images were acquired with a 40x, 1.3 NA oil-**  
391 **immersion objective. Sections were stained using immunohistochemistry with VGLUT1 (cyan) and neurofilament heavy**  
392 **(NFH, magenta). (A) Representative images from Scn1a-floxed (B) Scn1a-Het and (C) Scn1a-cKO mice. Scn1a-floxed,**  
393 **n=7; Scn1a-Het, n=8; Scn1a-cKO, n=9. Scale bar 50 $\mu$ m. n = muscle spindles.**  
394

395 We next asked whether the motor deficits of Scn1a-cKO mice are due to altered synaptic  
396 connectivity between proprioceptive axons and motor neurons in the ventral spinal cord. Spinal  
397 cord sections were harvested from Scn1a-floxed, Scn1a-Het, and Scn1a-cKO mice and stained  
398 with antibodies against vesicular glutamate transporter 1 (VGLUT1) to label proprioceptor axons,  
399 and choline acetyltransferase (ChAT). ChAT primarily labels  $\alpha$ - and  $\gamma$ -motoneurons in the ventral  
400 horn, which can be distinguished based on size. We analyzed the number of VGLUT1 puncta on  
401 the somata and proximal dendrites of individual cholinergic neurons greater than 400  $\mu$ m<sup>2</sup> to bias  
402 our quantification towards  $\alpha$ -motoneurons. We found no significant decrease in VGLUT puncta  
403 density per ChAT+ neuron between Scn1a-Het or Scn1a-cKO when compared to Scn1a-floxed

404 littermate controls (**Fig 7**, Scn1a-Het,  $p>0.9999$ , Scn1a-cKO,  $p=0.4573$ ). This suggests that  
405 general deficits in proprioceptor innervation of motor neurons do not contribute to the phenotype  
406 of Scn1a-cKO mice.  
407

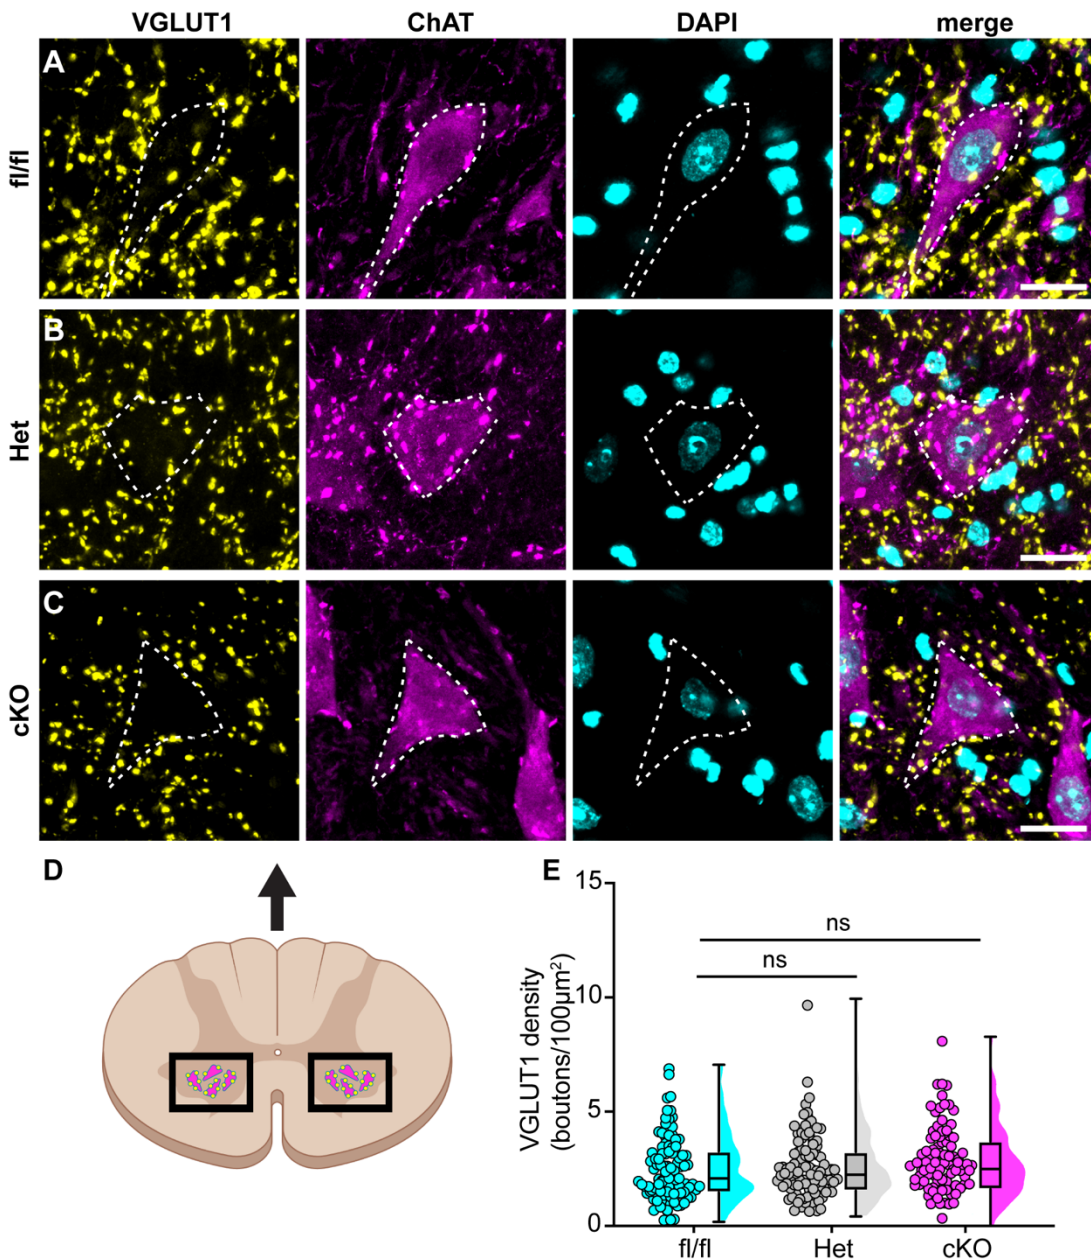

408

409 **Figure 7. Loss of Nav1.1 in sensory neurons does not change proprioceptor innervation of  $\alpha$ -motoneurons. A-**  
410 **C, Representative images of Scn1a-floxed(A), Scn1a-Het (B), and Scn1a-cKO (C) adult spinal cord sections (30  $\mu$ m).**  
411 **Images were acquired with a 63X, 1.4 NA water-immersion objective. Sections were stained using immunocytochemistry**

412 with VGLUT1 (yellow) and ChAT (magenta). Nuclei (cyan) were labeled with DAPI. **(D)** Schematic of spinal cord regions  
413 of interest. **(E)** Quantification of the average density of VGLUT1+ puncta per  $100\mu\text{m}^2$  onto ChAT+ neurons that were  
414 larger than  $400\mu\text{m}^2$ . A Kruskal-Wallis test with Dunn's post hoc comparison was used to determine statistical significance  
415 Each dot represents a motor neuron. Scn1a-floxed, n=101; Scn1a-Het n=102; Scn1a-cKO, n=92. Scale bar  $20\mu\text{m}$ . n =  
416 cells.  
417

418 We next asked whether proprioceptor electrical signaling is altered in Scn1a-cKO mice.  
419 While *in vitro* patch-clamp electrophysiology can assess  $\text{Na}_v$  function at DRG somata and provide  
420 insight as to how they contribute to intrinsic excitability, the physiological contributions of ion  
421 channels in DRG soma to somatosensory transmission *in vivo* are not well understood. Thus, to  
422 directly investigate how  $\text{Na}_v1.1$  shapes action potential propagation down proprioceptor axons,  
423 we used an *ex vivo* preparation to recording muscle afferent activity during ramp-and-hold stretch  
424 and sinusoidal vibration. Afferents from both Scn1a-Het and Scn1a-cKO mice exhibited impaired  
425 static stretch sensitivity as evidenced by a decreased likelihood of firing during rest as compared  
426 to Scn1a-floxed mice, as well as an inability to maintain firing throughout the entire 4s stretch.  
427 Almost all afferents from Scn1a-floxed mice could fire consistently throughout the entire 4s hold  
428 phase (**Fig 8A**), but loss of one or both copies of  $\text{Na}_v1.1$  led to either firing only near the beginning  
429 of stretch or inconsistent firing in a high percentage of afferents lacking  $\text{Na}_v1.1$  (**Fig 8B,C**). We  
430 quantified this inconsistent firing by determining the coefficient of variation (CV) of the interspike  
431 interval (ISI) during the plateau phase of stretch (1.5-3.5 s into the hold phase) across different  
432 stretch lengths and found a significant effect of genotype, with the knockout afferents both having  
433 higher ISI CV than the Scn1a-floxed afferents (**Fig 8D**;  $0.074 \pm 0.06$ ,  $0.313 \pm 0.456$ ,  $.497 \pm .831$ ,  
434 at 7.5% Lo, Scn1a-floxed, Scn1a-Het, and Scn1a-cKO afferents, respectively, Two-way ANOVA,  
435 main effect of genotype,  $p = 0.015$ ). In contrast to the clear deficits in static sensitivity in afferents  
436 lacking  $\text{Na}_v1.1$ , dynamic sensitivity was not significantly impaired. The maximum firing frequency  
437 during the ramp up phase (Dynamic Peak) was independent of genotype, and even trended  
438 slightly higher in afferents lacking  $\text{Na}_v1.1$  (**Fig 8E**; Two-way ANOVA, effect of genotype  
439  $p=0.0633$ ).

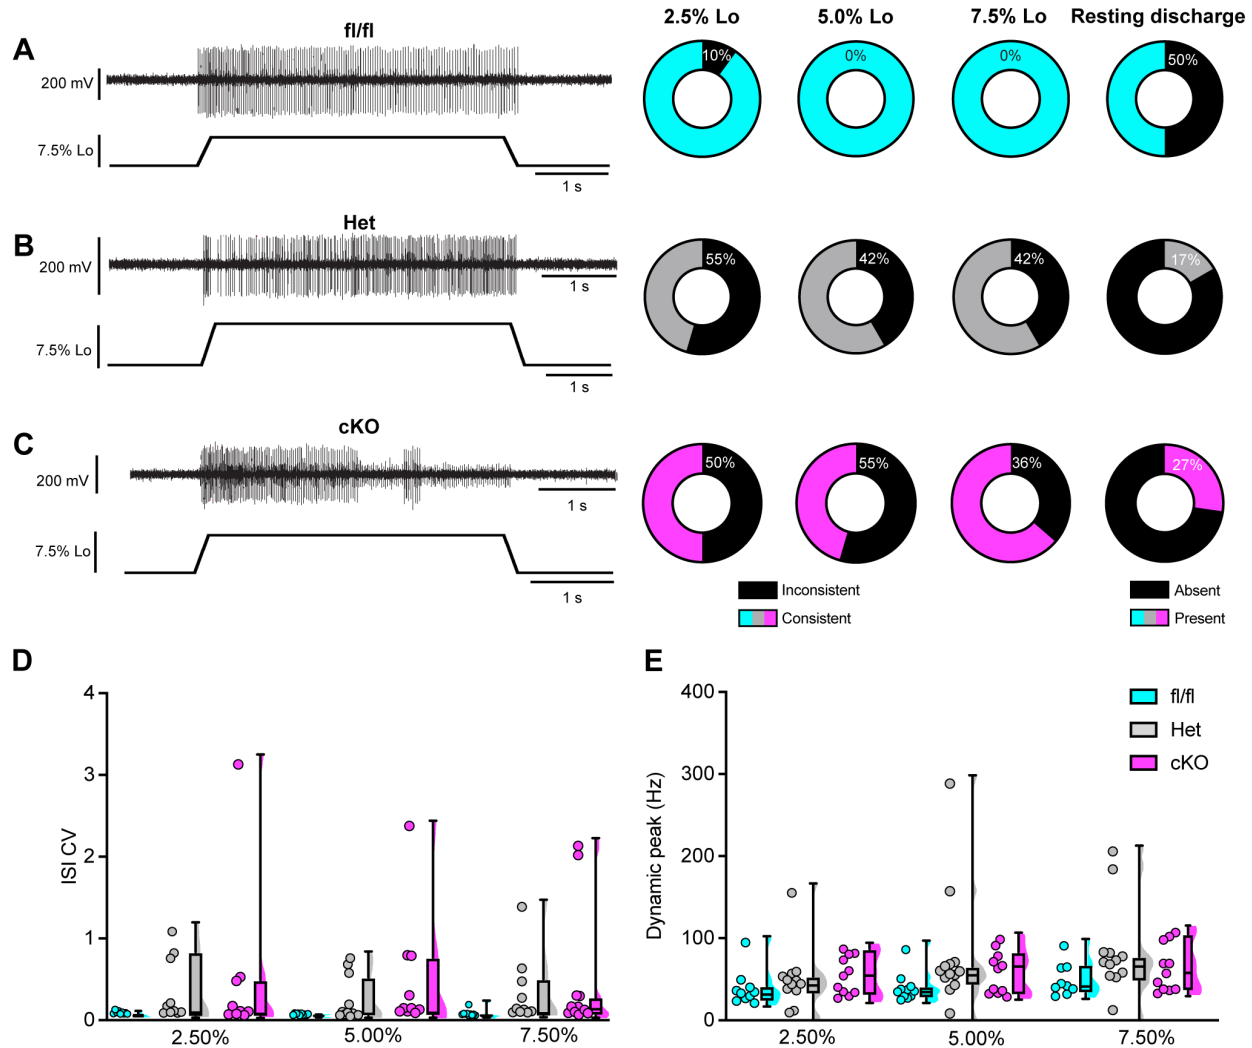

440

441 **Figure 8. Loss of Nav1.1 reduces static muscle stretch sensitivity and reliability.** A-C. Representative responses  
 442 to ramp-and-hold muscle stretch at 7.5% of optimal length (Lo) from Scn1a-floxed (A), Scn1a-Het (B) and Scn1a-cKO  
 443 (C) afferents. Afferents from Scn1a-Het and Scn1a-cKO mice were more likely to show inconsistent firing during the  
 444 hold phase of stretch. The percentage of afferents from each genotype that were able to fire consistently for the entire  
 445 duration of stretch at 2.5%, 5.0%, and 7.5% of Lo are shown in the pie charts next to the representative trace from their  
 446 genotype (black indicates percentage with inconsistent firing). The final pie charts represent the proportion of afferents  
 447 that exhibited resting discharge at Lo for every stretch for each genotype (black indicates absence of resting  
 448 discharge). D. Inconsistency in firing was quantified as the interspike interval coefficient of variation (ISI CV) during the  
 449 plateau stage of the hold phase of stretch (1.5-3.5s into stretch) for the 3 different genotypes. A significant effect of  
 450 genotype was observed (two-way mixed-design ANOVA,  $p=0.015$ ) E. The highest firing rate during the ramp up phase  
 451 of stretch (dynamic peak) is a measure of dynamic sensitivity. No significant effect of genotype on dynamic peak was  
 452 observed (two-way mixed-design ANOVA,  $p=0.0633$ ). Each dot represents one afferent in D & E (Scn1a-floxed,  $n=10$ ;  
 453 Scn1a-Het,  $n=12$ ; Scn1a-cKO,  $n=11$ ).  
 454

455 We next examined the requirement of Nav1.1 for proprioceptor afferent responses to  
 456 sinusoidal vibration, which is a measure of dynamic sensitivity, and found no differences with loss

457 of Nav1.1 (**Fig 9A-C, Tables 2-4**). We characterized a unit as having entrained to vibration if it  
458 fired at approximately the same time every cycle of the 9s vibration. In most cases, afferents  
459 lacking Nav1.1 were equally likely to entrain to vibration than Scn1a-floxed afferents (**Fig 9D-F**).  
460 Indeed, Scn1a-cKO afferents were able to maintain firing during the entire 9 s sinusoidal vibration,  
461 in contrast to their inability to maintain consistent firing during 4 s of static stretch. There were no  
462 significant differences in firing rate during vibration between Scn1a-floxed, Scn1a-Het, and  
463 Scn1a-cKO afferents (**Fig 9D-F**). Taken together, our *ex vivo* recordings suggest that behavioral  
464 deficits in Scn1a-cKO result from abnormal proprioceptor responses to static muscle movement,  
465 whereas afferent responsiveness to dynamic stimuli is Nav1.1-independent. Furthermore,  
466 recordings from Scn1a-Het animals support the notion that Nav1.1 is haploinsufficient for  
467 proprioceptor function at the cellular level.



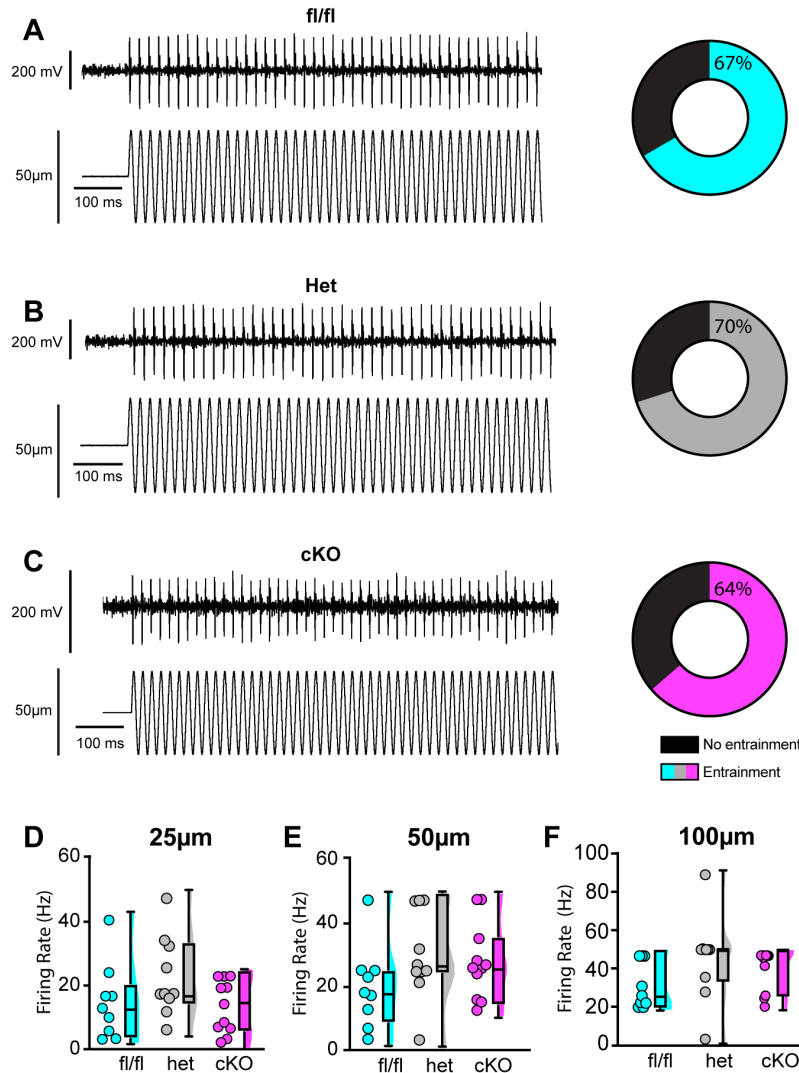

468

469

470

471

472

473

474

475

476

477

478

**Figure 9. Loss of  $Na_v1.1$  does not alter muscle spindle afferent response to vibratory muscle stretch. A-C.** Representative traces from afferents that were able to entrain to a 50Hz, 100µm vibration as well as graphs with the percentage of all *Scn1a*-floxed (cyan; **A**), *Scn1a*-Het (gray; **B**), and *Scn1a*-cKO (magenta; **C**) afferents that could entrain to the vibration shown in **A-C**. Average firing frequency during a 9 s 50 Hz vibration shown for a 25 µm (**D**), 50 µm (**E**), and 100 µm (**F**) amplitude vibration. There was no significant effect of genotype on the firing frequency during vibration (25 µm,  $p = 0.2398$ , 50 µm,  $p = 0.2413$ , 100 µm,  $p = 0.1276$ ). A one-way ANOVA was used to determine statistical significance in **D** and **E**. A Kruskal-Wallis test was used to determine statistical significance in **F**. Each dot represents one afferent (*Scn1a*-floxed,  $n=9$ ; *Scn1a*-Het,  $n=10$ ; *Scn1a*-cKO,  $n=11$ ).

**Table 2. Afferent entrainment to 25 µm amplitude vibration**

| Genotype             | 10 Hz  | 25 Hz  | 50 Hz  | 100 Hz |
|----------------------|--------|--------|--------|--------|
| <i>Scn1a</i> -floxed | 33.33% | 11.11% | 0.00%  | 0.00%  |
| <i>Scn1a</i> -Het    | 50.00% | 40.00% | 10.00% | 10.00% |
| <i>Scn1a</i> -cKO    | 27.27% | 9.09%  | 0.00%  | 0.00%  |

479

**Table 2.** The percentage of muscle spindle afferents that entrained to a 25µm amplitude sinusoidal vibration.

480  
481  
482

**Table 3. Afferent entrainment to 50  $\mu$ m amplitude vibration**

| Genotype     | 10 Hz  | 25 Hz  | 50 Hz  | 100 Hz |
|--------------|--------|--------|--------|--------|
| Scn1a-floxed | 88.89% | 22.22% | 11.11% | 11.11% |
| Scn1a-Het    | 80.00% | 70.00% | 30.00% | 10.00% |
| Scn1a-cKO    | 45.45% | 54.55% | 18.18% | 0.00%  |

483 **Table 3.** The percentage of muscle spindle afferents that entrained to a 50 $\mu$ m amplitude sinusoidal vibration.

484

485

486

**Table 4. Afferent entrainment to 100  $\mu$ m amplitude vibration**

| Genotype     | 10 Hz   | 25 Hz  | 50 Hz  | 100 Hz |
|--------------|---------|--------|--------|--------|
| Scn1a-floxed | 100.00% | 44.44% | 33.33% | 22.22% |
| Scn1a-Het    | 90.00%  | 90.00% | 70.00% | 40.00% |
| Scn1a-cKO    | 63.64%  | 72.73% | 63.64% | 18.18% |

487 **Table 4.** The percentage of muscle spindle afferents that entrained to a 100 $\mu$ m amplitude sinusoidal vibration.

488

## 489 **DISCUSSION**

490

491

492

493

494

495

496

497

498

499

500

501

502

503

The critical role for Nav1.1 in various brain disorders has overshadowed the potential contributions of this channel in peripheral signaling. The results presented in this study are the first to provide functional evidence that Nav1.1 in peripheral sensory neurons is required for normal proprioception. We found that mice lacking Nav1.1 in sensory neurons exhibit visible motor deficits and ataxic-like behaviors, which we propose is largely attributed to loss of Nav1.1 in proprioceptors. Indeed, RNAscope analysis showed expression of Nav1.1 mRNA in 100% of genetically identified proprioceptors. While Nav1.6 and Nav1.7 were also ubiquitously expressed in proprioceptors, Nav1.1 displayed higher expression levels, consistent with a previous RNAsequencing study (Zheng et al., 2019b). There are anywhere from 5 to 8 different proprioceptor molecular subclasses (Oliver et al., 2021b; Wu et al., 2021), however, and it is possible that these distinct classes rely on different combinations of these channels for function. Nevertheless, our functional *in vitro* patch-clamp experiments found Nav1.1 to be the dominant subtype across recorded neurons, comprising nearly half of the proprioceptor  $I_{Na}$ . In line with this, pharmacological inhibition of Nav1.1 is sufficient to significantly attenuate action potential firing is

504 most proprioceptors; yet, it should be noted that 25% of the neurons we recorded fired action  
505 potentials that were insensitive to ICA application. This suggests that some proprioceptor  
506 subtypes rely more heavily on Nav1.6 and Nav1.7 for electrical activity. Interestingly, the  
507 proprioceptors that were insensitive to ICA application also were less intrinsic excitable, firing only  
508 1-2 action potentials in response to current injection, as opposed to the other 75% on neurons  
509 recorded, which fired repetitively during the 100 ms injection protocol. This further supports a role  
510 for Nav1.1 in maintaining action potential firing in response to sustained stimulation. These results,  
511 however, should be interpreted with the caveat that in these experiments ICA may also be acting  
512 on Nav1.3 channels that are upregulated during DRG neuron culturing (Wangzhou et al., 2020).  
513 Nevertheless, at the afferent level Scn1a-cKO and Scn1a-Het animals show clear deficits in static  
514 stretch sensitivity, but not dynamic sensitivity, and could even entrain to vibrations as fast as 100  
515 Hz, suggesting a specific role for Nav1.1 in proprioceptors responses to static muscle movement.  
516 Finally, we found that loss of Nav1.1 in sensory neurons had no effect on proprioceptor  
517 development, muscle spindle morphology, or proprioceptive afferent innervation of ChAT+ motor  
518 neurons in the spinal cord. Thus, the observed motor behavioral deficits are likely due to reduced  
519 static sensitivity of proprioceptor afferents.

520 Our model proposes that Nav1.1 is tasked with maintaining consistent firing in spindle  
521 afferents during static muscle stretch for normal motor behaviors, whereby activation of the  
522 mechanotransduction channel Piezo2 initiates electrical signaling, which in turn activates a  
523 complement of tetrodotoxin-sensitive Nav channels (Carrasco et al., 2017; Florez-Paz et al., 2016;  
524 Woo et al., 2015, **Fig 10**). During dynamic or vibratory stimuli, Piezo2, and likely a combination of  
525 other molecular mediators, including Nav1.6 and Nav1.7, are sufficient to elicit normal electrical  
526 activity. Conversely, during prolonged muscle stretch when Piezo2 channels presumably  
527 inactivate, Nav1.1 is required for regular and reliable firing. While other signaling molecules and  
528 channels, such as vesicle-released glutamate (Bewick et al., 2005; Than et al., 2021), and

529 mechanosensitive ASIC channels (Lin et al., 2016) and ENaC channels (Bewick and Banks,  
530 2015), also contribute to mammalian proprioception, our data suggests  $Na_v1.1$  is a critical for  
531 muscle spindle afferent mechanotransduction, given the overt behavioral deficits observed in  
532  $Scn1a$ -cKO mice. Due to the ubiquitous expression of  $Na_v1.1$  in all proprioceptors and the  
533 importance of Golgi Tendon Organ (GTO) feedback to motor control, alterations in function in  
534 those proprioceptors likely contribute to the behavioral deficits we observed; however, we did not  
535 directly measure their function.

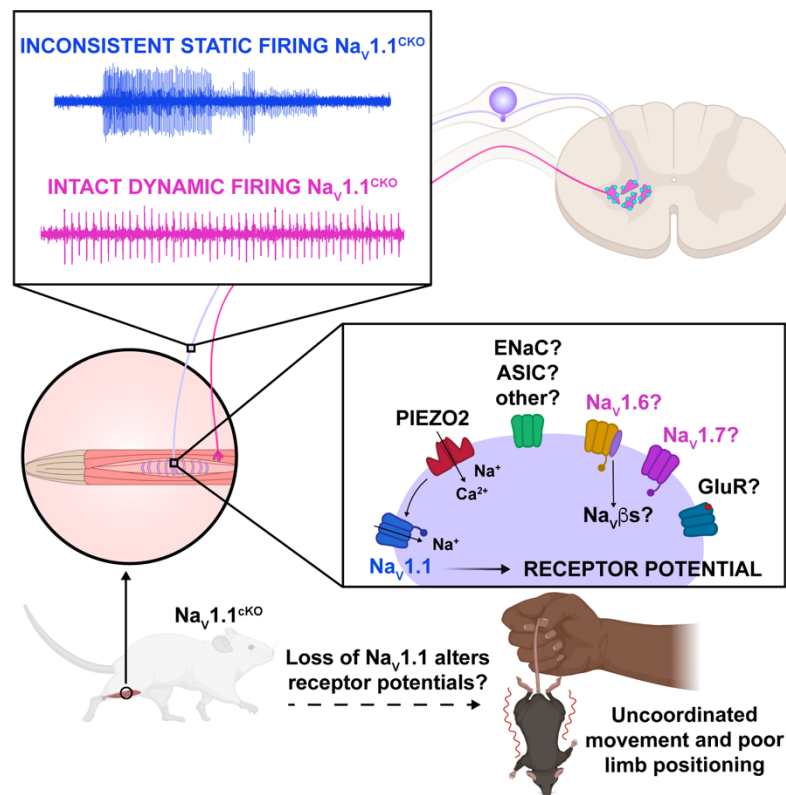

536

537 **Figure 10. Proposed model of the role of  $Na_v1.1$  in proprioception.** Upon muscle static stretch, various channels  
538 activate, including Piezo2 (red) which results in an influx of calcium and sodium ions, causing a depolarization that  
539 activates  $Na_v1.1$  (dark blue).  $Na_v1.1$  activation drives reliable repetitive firing of proprioceptors during static stretch for  
540 normal motor behavior. Loss of  $Na_v1.1$  in sensory neurons results in inconsistent static firing at the afferent level while  
541 maintaining dynamic firing, resulting in uncoordinated movements and abnormal limb positioning. It is possible that a  
542 combination of Piezo2,  $Na_v1.6$  (yellow),  $Na_v1.7$  (pink), and/or other channels, such as glutamate receptors (dark blue),  
543 ASIC and ENaC channels (green) mediate dynamic firing.  
544

545 To date, our knowledge of the functional contributions of Nav1.1 in the PNS is limited.  
546 Most studies have identified roles for this channel in mechanical pain signaling in DRG, TG, and  
547 vagal sensory neurons. Intraplantar pharmacological activation of Nav1.1 induces spontaneous  
548 pain behaviors and mechanical pain, which is absent in mice lacking Nav1.1 in small- and  
549 medium-diameter sensory neurons (Osteen et al., 2016b). Inhibition of Nav1.1 prevented the  
550 development of mechanical pain in several preclinical models, including spared nerve injury  
551 (Salvatierra et al., 2018b), an irritable bowel syndrome mouse model (Salvatierra et al., 2018),  
552 and infraorbital nerve chronic constriction injury (Pineda-Farias et al., 2021). Additionally, blocking  
553 Nav1.1 channels inhibited firing in TRPM8-expressing neurons *in vitro*, suggesting a potential role  
554 for this channel in thermosensation (Griffith et al., 2019). No prior studies, however, have reported  
555 a functional role for Nav1.1, or Navs in general, in proprioception.

556 The loss of consistent firing we observed during static stretch in Scn1a-cKO and Scn1a-  
557 Het animals is functionally similar to deletion of Nav1.1 in other brain cell types. Indeed, loss of a  
558 single copy of Nav1.1 is sufficient to attenuate sustained action potential firing in parvalbumin-  
559 positive hippocampal interneurons (Ogiwara et al., 2007; Yu et al., 2006) and cerebellar Purkinje  
560 neurons (Yu et al., 2006). Nav1.1 has been associated with persistent sodium current ( $I_{NaP}$ ) and  
561 resurgent sodium current ( $I_{NaR}$ ), both of which promote repetitive firing in a wide variety of cell  
562 types in the CNS and PNS (Barbosa et al., 2015; Kalume et al., 2007; Khaliq et al., 2003). Nav1.1  
563 also recovers rapidly from fast inactivation compared to other channel subtypes (Herzog et al.,  
564 2003; Patel et al., 2015) and has been shown to be refractory to entry into slow inactivation in  
565 TRPM8-expressing DRG neurons (Griffith et al., 2019). We observed similar characteristics when  
566 analyzing the proprioceptor  $I_{Na}$ . Future studies will determine whether proprioceptors rely on these  
567 features of Nav1.1 for reliable and consistent encoding of static muscle stretch.

568 Loss of Nav1.1 notably impacted proprioceptor afferent static sensitivity during ramp-and-  
569 hold stretch, but not dynamic sensitivity as measured by entrainment to sinusoidal vibrations using  
570 *ex vivo* muscle-nerve recordings. Afferents from Scn1a-cKO animals were more likely to have

571 action potential failures and thus were largely unable to fire consistently throughout the 4 s of  
572 stretch, which was accompanied by a higher coefficient of variability in the ISI. This indicates that  
573 Nav1.1 has a critical role in transmitting static stretch information to the central nervous system.  
574 Interestingly, however, dynamic sensitivity in these afferents appears to be unimpaired. Both  
575 Scn1a-cKO and Scn1a-Het afferents were able to entrain throughout the entire 9 s vibration;  
576 therefore, Nav1.1 does appear to have a generalized role in maintaining high frequency firing, but  
577 a more specific deficit in static sensitivity. Nav1.1 has been localized to muscle spindle afferent  
578 endings and has been hypothesized to help amplify receptor current (Carrasco et al., 2017) . Our  
579 results support a model whereby current from Piezo2 and potentially other mechanically sensitive  
580 ion channels at the start of stretch produces a sufficient receptor potential to generate firing at the  
581 heminode, but that amplification of the receptor potential by Nav1.1 is necessary to maintain firing  
582 during held stretch.

583         A similar deficit in static but not dynamic sensitivity was seen following loss of synaptic-  
584 like vesicle released glutamate from afferent endings (Than et al., 2021); however in those  
585 afferents firing only occurred at the beginning of stretch and patchy firing was never observed.  
586 This may indicate that glutamate plays a more general role maintaining excitability, whereas  
587 Nav1.1 is required for reliable action potential generation at heminodes during static stimuli.  
588 Alternatively, or in addition, Nav1.1 expressed along the axon could be essential for sustained  
589 static firing. A detailed examination of Nav1.1 subcellular localization along proprioceptor afferents  
590 could shed light on how this channel contributes to signal propagation. The lack of an effect on  
591 dynamic sensitivity could suggest the upregulation of other Nav subtypes or other molecules as a  
592 compensatory mechanism to counteract the loss of Nav1.1. Indeed, our *in vitro*  
593 electrophysiological experiments found a more pronounced effect of acute Nav1.1 inhibition on  
594 proprioceptor excitability. This could be due, however, to artificially upregulated Nav1.3 channel  
595 activity in culturing conditions, or conversely, a higher density of Nav1.1 expression in

596 proprioceptor somata. Future studies using temporally controlled deletion of Nav1.1 in sensory  
597 neurons could tease this apart. Nevertheless, as static sensitivity is still very much impaired in  
598 both Scn1a-cKO and Scn1a-Het afferents, Nav1.1 may play a potentially unique role in  
599 maintaining afferent firing during the sustained stretch.

600         Loss of Nav1.1 in sensory neurons did not impact proprioceptor development, as the  
601 number of proprioceptors in DRG sections was unchanged between genotypes, and muscle  
602 spindles developed normally in our model. While we did not directly examine GTOs, we do not  
603 anticipate that abnormal end organ development would be restricted to that proprioceptor  
604 subtype. Additionally, we did not observe a general decrease in  $\alpha$ -motor neuron innervation,  
605 which is consistent with the findings of Mendelsohn et al., 2015, who reported loss of proprioceptor  
606 activity does not generally reduce proprioceptive input into the spinal cord. Interestingly, however,  
607 the authors did observe changes in heteronymous sensory-motor connectivity when proprioceptor  
608 transmission was blocked, whereby proprioceptor innervation of motor neurons that project to  
609 antagonistic muscles was increased. Whether loss of Nav1.1 in proprioceptive afferents causes  
610 them to “mis-wire” in our model to make connections with inappropriate motor neuron pools is  
611 unclear. Future studies will determine if this contributes to the observed behavioral deficits.

612         We found effects of both pharmacological inhibition and genetic deletion of Nav1.1 in *in*  
613 *vitro* and *ex vivo* electrophysiological experiments, respectively (**Figs 2-3, 8-9**); however, in our  
614 mouse model Nav1.1 is deleted in all sensory neurons. Thus, we cannot rule out that loss of  
615 Nav1.1 in other mechanosensory neuron populations, such as touch receptors, contributes to the  
616 motor deficits observed. Deletion of Nav1.1 in small- and medium-diameter DRG neurons using  
617 a peripherin-Cre driver did not produce visible motor deficits (Osteen et al., 2016b), indicating  
618 sensory neuron populations in those categories are not involved. We did observe Nav1.1  
619 transcripts in the vast majority of myelinated DRG neurons (a combination of large- and medium-  
620 diameter DRG neurons), consistent with its presence in different subclasses of tactile sensory

621 neurons (Zheng et al., 2019). However, the severe motor phenotype of *Scn1a*-cKO mice  
622 precludes mechanical threshold analysis using von Frey or tactile sensitivity using tape test.  
623 Notably, baseline mechanical thresholds were unchanged following intraplantar injection of a  
624 selective  $\text{Na}_v1.1$  inhibitor (Salvatierra et al., 2018). This suggests that while  $\text{Na}_v1.1$  mRNA is  
625 expressed in most tactile sensory neurons, functional protein may only be upregulated in these  
626 populations during pathological states.

627         Despite this limitation, one noteworthy and intriguing finding from our study was the  
628 haploinsufficiency of  $\text{Na}_v1.1$  in sensory neurons for proprioceptor function and normal motor  
629 behavior in the open field test. At the afferent level, heterozygous and homozygous loss of  $\text{Na}_v1.1$   
630 produced similar deficits in static firing, suggesting that loss of less than a quarter of the  
631 proprioceptor  $I_{\text{Na}}$  is sufficient to impair proprioceptor responsiveness to muscle stretch.  $\text{Na}_v1.1$  is  
632 haploinsufficeint in several brain neuron cell-types for normal excitability and function (Ogiwara  
633 et al., 2007; Yu et al., 2006), suggesting the contributions of  $\text{Na}_v1.1$  to neuronal function are highly  
634 sensitive to genetic perturbations. At the behavioral level, *Scn1a*-Het mice had an identical  
635 phenotype to *Scn1a*-cKO mice, moving more slowly and less than controls, despite not having  
636 the more severe and visible motor coordination deficits. Indeed, their performance on the rotarod  
637 was identical to that of *Scn1a*-floxed controls (**Fig 5**). How these behavioral differences arise given  
638 the similar transmission deficits in *Scn1a*-cKO and *Scn1a*-Het afferents is unclear. One possibility  
639 is a presynaptic role for  $\text{Na}_v1.1$  in proprioceptive terminals that is unveiled when both copies of  
640  $\text{Na}_v1.1$  are lost. For example, loss of presynaptic  $\text{Na}_v1.7$  channels in the spinal cord reduced  
641 glutamate release from nociceptive afferents onto dorsal horn neurons (MacDonald et al., 2021).  
642 If a similar mechanism is at play for  $\text{Na}_v1.1$  in proprioceptors, reduced neurotransmitter release  
643 from *Scn1a*-Het afferent terminals could be sufficient to produce quantifiable, albeit more subtle,  
644 motor deficits. Future studies are required to test this possibility.

645         Notably, *Scn1a* is a super culprit gene with over one thousand associated disease-causing  
646 mutations, most of which are linked to different forms of epilepsy. Many epilepsy patients with



647 hemizygous Nav1.1 loss-of-function display ataxia and motor delays and deficiencies (Claes et  
648 al., 2001; Fujiwara et al., 2003), which has traditionally been attributed to loss of Nav1.1 function  
649 in the brain, namely the cerebellum (Kalume et al., 2007). Our findings suggest that some of the  
650 clinical manifestations associated with epilepsy are not solely due to Nav1.1 loss-of-function in  
651 the brain, but also may manifest in part as a result from unreliable coding by peripheral  
652 proprioceptors.

653 Data presented in this study provide new evidence of a role for peripherally expressed  
654 Nav1.1 in motor coordination. We show that Nav1.1 is ubiquitously and strongly expressed in  
655 proprioceptors, contributes to proprioceptor excitability *in vitro* and *ex vivo*, and is haploinsufficient  
656 in sensory neurons for normal motor behaviors. Collectively, this work identifies a new role for  
657 Nav1.1 in mammalian proprioception.

## 658 MATERIALS AND METHODS

659 **Key resources.** Table 1 contains a list of key resources and supplies used for this study.

| Key Resources Table      |                              |                                           |                                    |                                                         |
|--------------------------|------------------------------|-------------------------------------------|------------------------------------|---------------------------------------------------------|
| Reagent type or resource | Designation                  | Source or Reference                       | Identifiers                        | Additional information                                  |
| Antibody                 | Rabbit polyclonal anti-DsRed | Takara Bio                                | Catalogue #632496                  | 1:3000                                                  |
| Antibody                 | Chicken polyclonal GFP       | Abcam                                     | Catalogue #ab13970                 | 1:3000                                                  |
| Antibody                 | Chicken polyclonal NFH       | Abcam                                     | Catalogue #ab4680                  | In muscle spindles: (1:300)<br>In DRG: (1:3000)         |
| Antibody                 | Rabbit polyclonal CGRP       | Immunostar                                | Catalogue #24112                   | 1:1000                                                  |
| Antibody                 | Guinea pig polyclonal VGLUT1 | Zuckerman institute (Columbia University) | Catalogue #CU1706, RRID:AB_2665455 | In spinal cord: (1:8000)<br>In muscle spindles: (1:800) |

|                         |                                                            |                                           |                        |          |
|-------------------------|------------------------------------------------------------|-------------------------------------------|------------------------|----------|
| Antibody                | Chicken polyclonal $\beta$ 3-tubulin                       | Abcam                                     | Catalogue #ab41489     | 1:500    |
| Antibody                | Rabbit polyclonal $\beta$ 3-tubulin                        | Abcam                                     | Catalogue #ab18207     | 1:3000   |
| Antibody                | Rabbit polyclonal ChAT                                     | Zuckerman institute (Columbia University) | Catalog #CU1574        | 1:10,000 |
| Chemical compound, drug | VECTASHIELD <sup>®</sup> Antifade Mounting Media with DAPI | Vector Laboratories                       | Catalogue #H-2000      |          |
| Chemical compound, drug | Tissue-Tek OCT compound                                    | Sakura                                    | Catalogue #4583        |          |
| Chemical compound, drug | Laminin                                                    | Sigma-Aldrich                             | Catalogue #L2020-1MG   |          |
| Chemical compound, drug | Collagenase type P                                         | Sigma-Aldrich                             | Catalogue #11213865001 |          |
| Chemical compound, drug | TrypLE Express                                             | Thermofisher                              | Catalogue #12605-010   |          |
| Chemical compound, drug | MEM                                                        | Thermofisher                              | Catalogue #11095-080   |          |
| Chemical compound, drug | Penicillin-streptomycin                                    | Thermofisher                              | Catalogue #15140-122   |          |
| Chemical compound, drug | MEM vitamin solution                                       | Thermofisher                              | Catalogue #11120-052   |          |
| Chemical compound, drug | B-27 supplement                                            | Thermofisher                              | Catalogue #17504-044   |          |
| Chemical compound, drug | Horse serum, heat inactivated                              | Thermofisher                              | Catalogue #26050-070   |          |
| Chemical compound, drug | ICA 121431                                                 | Tocris Bioscience                         | Catalogue #5066/10     |          |
| Chemical compound, drug | 4,9 – anhydrous tetrodotoxin                               | Tocris Bioscience                         | Catalogue #6159        |          |

|                         |                                     |                           |                                                                                                               |  |
|-------------------------|-------------------------------------|---------------------------|---------------------------------------------------------------------------------------------------------------|--|
| Chemical compound, drug | PF- 05089771                        | Tocris Bioscience         | Catalogue #5931                                                                                               |  |
| Chemical compound, drug | Tetrodotoxin                        | Abcam                     | Catalogue ab120054                                                                                            |  |
| Assay Kit               | RNAscope Fluorescence Multiplex Kit | Advanced Cell Diagnostics | Catalogue #320851                                                                                             |  |
| Oligonucleotide         | <i>Pvalb</i> probe channel 1        | Advanced Cell Diagnostics | Catalogue #421931                                                                                             |  |
| Oligonucleotide         | <i>Scn1a</i> probe channel 2        | Advanced Cell Diagnostics | Catalogue #556181-C2                                                                                          |  |
| Oligonucleotide         | <i>Scn8a</i> probe channel 2        | Advanced Cell Diagnostics | Catalogue #313341-C2                                                                                          |  |
| Oligonucleotide         | <i>Scn9a</i> probe channel 2        | Advanced Cell Diagnostics | Catalogue #434191-C2                                                                                          |  |
| Oligonucleotide         | <i>Runx3</i> probe channel 3        | Advanced Cell Diagnostics | Catalogue #451271-C3                                                                                          |  |
| Mouse Strain            | <i>Pirt</i> <sup>cre</sup>          | Dr. Xinzhong Dong         |                                                                                                               |  |
| Mouse Strain            | <i>Rosa26</i> <sup>Ai14</sup>       | Jackson Laboratories      | Stock #007914                                                                                                 |  |
| Mouse Strain            | <i>Pvalb</i> <sup>cre</sup>         | Jackson Laboratories      | Stock #008069                                                                                                 |  |
| Mouse Strain            | Scn1a-floxed                        | UC Davis MMRRC            | Stock # 041829-UCD                                                                                            |  |
| Mouse Strain            | <i>Mrgprd</i> <sup>GFP</sup>        | Zheng et al., 2019        |                                                                                                               |  |
| Software/ Algorithms    | pClamp 11.2 Software Suite          | Molecular Devices         | <a href="https://www.moleculardevices.com">https://www.moleculardevices.com</a>                               |  |
| Software/ Algorithms    | Image J                             | Schneider et al. (2012)   | <a href="https://imagej.nih.gov">https://imagej.nih.gov</a>                                                   |  |
| Software/ Algorithms    | Prism 9                             | Graphpad                  | <a href="https://www.graphpad.com">https://www.graphpad.com</a>                                               |  |
| Software/ Algorithms    | LabChart                            | ADInstruments             | <a href="https://www.adinstruments.com/products/labchart">https://www.adinstruments.com/products/labchart</a> |  |

|                         |                                               |            |                                                                                                                                                     |                                                                                                         |
|-------------------------|-----------------------------------------------|------------|-----------------------------------------------------------------------------------------------------------------------------------------------------|---------------------------------------------------------------------------------------------------------|
| Software/<br>Algorithms | MATLAB                                        | MathWorks  | <a href="https://www.mathworks.com">https://www.mathworks.com</a>                                                                                   |                                                                                                         |
| Software/<br>Algorithms | Software,<br>algorithm,<br>custom<br>(MATLAB) | This study | <a href="https://github.com/doctheagrif/Current-Clamp-Matlab-Code_O-Neil-DA">https://github.com/doctheagrif/Current-Clamp-Matlab-Code_O-Neil-DA</a> | Current clamp experiments were analyzed with a custom written Matlab Script that is available on Github |

660

661 **Animals.** *Pirt<sup>cre</sup>* mice were a kind gift from Dr. Xinzhong Dong (Johns Hopkins University).

662 *Rosa26<sup>Ai14</sup>* (stock #007914; (Madisen et al., 2010)) and *Pvalb<sup>cre</sup>* (stock # 008069) were obtained

663 from Jackson Laboratories. *Scn1a*-floxed (stock # 041829-UCD) mice were purchased from the

664 UC Davis MMRRC. *Mrgprd* mice were originally published in Zheng et al., 2019. All mice used

665 were on a mixed C57BL/6 background (non-congenic) Genotyping was outsourced to Transnetyx.

666 Animal use was conducted according to guidelines from the National Institutes of Health's Guide

667 for the Care and Use of Laboratory Animals and was approved by the Institutional Animal Care

668 and Use Committee of Rutgers University-Newark (PROTO201900161), UC Davis (#21947 and

669 #22438) and San José State University (#990, ex vivo muscle recordings). Mice were maintained

670 on a 12 h light/dark cycle, and food and water was provided *ad libitum*.

671

672 **Rotarod.** To assess motor coordination, a rotarod machine (IITC Life Sciences, Woodland Hills,

673 CA) that has an accelerating rotating cylinder was used. 8-10 week old mice of both sexes were

674 acclimated to the behavior room for 2 h prior to testing. Mice were assayed on the rotarod for 3

675 consecutive days, with 3 trials per day and an intertrial interval of at least 15 min. The average of

676 the three trials per day was used. The experimenter was blind to genotype.

677

678 **Open field test.** 8-10 week old mice of both sexes were acclimated to the behavior room for 2 h

679 prior to testing. The open field apparatus consisted of a black square sound attenuating box of

680 dimensions 40.6 cm × 40.6 cm. A camera suspended above the arena was connected to a  
681 computer running Ethovision XT software, which tracked animal movement and velocity. An  
682 animal was placed in the center of the arena and allowed to freely explore for a 10 min trial. The  
683 experimenter was blind to genotype.

684

685 **Tissue processing.** For spinal cord immunolabeling experiments, whole spinal columns from  
686 adult (8-15 weeks) *Pirt<sup>Cre</sup>;Rosa26<sup>Ai14</sup>* and *Pirt<sup>Cre</sup>;Scn1a*-floxed animals of both sexes were  
687 harvested on ice. For Tdtomato IHC, spinal columns were fixed overnight at 4°C in 4%  
688 paraformaldehyde. For vesicular glutamate transporter 1 (VGLUT1) and choline acetyltransferase  
689 (ChAT) co-labeling experiments, spinal columns were fixed in 4% paraformaldehyde for 1 h on  
690 ice. Tissue was then placed in 30% sucrose solution overnight at 4°C. Following cryoprotection,  
691 tissue was embedded in optimal cutting temperature compound (OCT, Tissue-Tek® Sakura) and  
692 stored at -80°C until sectioning. DRG from adult (8-15 weeks) animals of both sexes were  
693 harvested from thoracic spinal levels and fixed in 4% formaldehyde for 15 min at 4°C and were  
694 then incubated in 30% sucrose for 2-4 h at 4°C. DRG were embedded in OCT and stored at -  
695 80°C until sectioning.

696

697 **Immunohistochemistry.** Immunohistochemistry of spinal cord cryostat sections (30µm) was  
698 performed using the following primary antibodies: Rabbit anti-DsRed (1:3000, Takara Bio,  
699 632496), guinea pig anti-VGLUT1 (1:8000, Zuckerman Institute, 1705), and rabbit anti-ChAT  
700 (1:10,000, Zuckerman Institute, 1574). Secondary antibodies used were as follows: anti-rabbit  
701 594 (1:1000, ThermoFisher, A32740), anti-guinea pig 488 (1:1000, ThermoFisher, A11073), and  
702 anti-chicken 647 (ThermoFisher, A32733). Specimens were mounted with Fluoromount-G with  
703 DAPI (SouthernBiotech, 0100-20). EDL muscles used in *ex vivo* muscle afferent recordings were  
704 placed in ice cold 4% paraformaldehyde for 1 h followed by ice cold methanol for 15 min. Muscles

705 were incubated in blocking solution (0.3% PBS-T and 1% BSA) followed by incubation in primary  
706 antibodies (guinea pig anti-VGLUT1 1:800 and chicken anti-NFH 1:300, ThermoFisher ab4680)  
707 for 3-6 days at 4°C. After primary antibody treatment, tissue was washed in blocking solution and  
708 treated with secondary antibody (anti-guinea pig 488 1:50 and anti-chicken 594 1:300, Invitrogen,  
709 WA316328) for 2-3 days. Specimens were mounted with VECTASHIELD® with DAPI (H-2000,  
710 Vector Laboratories). All specimens were imaged in three dimensions on a on a Zeiss LSM880  
711 Airyscan confocal microscope. Images were analyzed using ImageJ software.

712

713 **Multiplex in situ hybridization.** Fixed-frozen DRG tissue from 8-15 week old mice of both sexes  
714 was cut in 25µm sections and placed on electrostatically coated slides. Sections were processed  
715 for RNA *in situ* detection using a modified version of the manufacturer's protocol ((Griffith et al.,  
716 2019), Advanced Cell Diagnostics) and the following probes: *Pvalb* (421931- C1, mouse), *Runx3*  
717 (451271-C3, mouse), *Scn1a* (556181-C2, mouse), *Scn8a* (313341-C2, mouse), and *Scn9a*  
718 (434191-C2, mouse). Following *in situ* hybridization, sections were incubated in blocking solution  
719 (5% normal goat serum, 0.1% PBS-T) for 1 h at RT. Tissue was then incubated in primary  
720 antibodies overnight at 4°C. The following antibodies were used: rabbit DsRed (1:3000, Takara  
721 Bio, 632496), rabbit β3-tubulin (1:3000, Abcam, ab18207), chicken β3-tubulin (1:500, Abcam,  
722 ab41489), rabbit CGRP (1:1000, Immunostar, 24112), chicken GFP (1:3000, Abcam, ab13970),  
723 and chicken NFH (1:3000, Abcam, ab4680). Tissue was treated with the following secondary  
724 antibodies for 45 min at RT: anti-rabbit 448 (1:1000, Invitrogen, A32731), 594 (1:1000, Invitrogen,  
725 A11037) and 647 (1:1000, Invitrogen, A32733), anti-chicken 488 (1:1000, Invitrogen, A32931)  
726 and 594 (1:1000, Invitrogen, A32740). Sections were washed and mounted with Fluoromount-G  
727 with DAPI and imaged in three dimensions (2µm axial steps) on an Olympus confocal (LV3000)  
728 using a 40X 0.90 NA water objective lens. Images were auto-thresholded and the probe signal  
729 integrated density for individual neurons was analyzed using ImageJ software. The coefficients

730 of variation for *Scn1a*, *Scn8a*, and *Scn9a* integrated densities were calculated in Prism 9.0  
731 (GraphPad Software) using the following formula:  $CV = \mu/\sigma * 100$ .

732

733 **DRG culture preparation.** DRG were harvested from thoracic spinal levels of adult  
734 *Pvalb<sup>cre</sup>;Rosa26<sup>Ai14</sup>* and *Pirt<sup>cre</sup>;Scn1a*-floxed (6-16 weeks) mice of both sexes and transferred to  
735  $Ca^{2+}$ -free and  $Mg^{2+}$ -free HBSS solution (Invitrogen, 14170-112). Upon isolation, processes were  
736 trimmed, and ganglia were transferred into collagenase (1.5 mg/mL; Type P, Sigma-Aldrich,  
737 11213865001) in HBSS for 20 min at 37°C followed by TrypLE Express (ThermoFisher, 12605-  
738 010) for 3 min with gentle rotation. TrypLE was neutralized with 10% horse serum (heat-  
739 inactivated; Invitrogen, 26050-070) and supplemented with culture media (MEM with L-glutamine,  
740 Phenol Red, without sodium pyruvate, ThermoFisher, 11095-080), containing 10,000 U/mL  
741 Penicillin-streptomycin (ThermoFisher, 15140-122), MEM Vitamin Solution (Invitrogen, 11120-  
742 052), and B-27 supplement (ThermoFisher, 17504-044). Serum containing media was decanted  
743 and cells were triturated using a fire-polished Pasteur pipette in the MEM culture media described  
744 above. Cells were resuspended and triturated using a plastic pipette tip. Cells were plated on  
745 glass coverslips that had been washed in 2M NaOH for at least 4 h, rinsed with 70% ethanol, UV-  
746 sterilized, and treated with laminin (0.05 mg/mL, Sigma-Aldrich, L2020-1MG) for 1 hour prior to  
747 plating. Cells were then incubated at 37°C in 5% CO<sub>2</sub>. Cells were used for electrophysiology  
748 experiments 14-36 h post-plating.

749

750 **In Vitro Electrophysiology.** Whole-cell voltage-clamp recordings were made from dissociated  
751 DRG neurons using patch pipettes pulled from Model P-1000 (Sutter Instruments). Patch pipettes  
752 had a resistance of 3-5MΩ when filled with an internal solution containing the following (in mM):  
753 140 CsF, 10 NaCl, 1.1 EGTA, .1 CaCl<sub>2</sub>, 10 HEPES, and 2.5 MgATP, pH with CsOH to 7.2. Seals  
754 and whole-cell configuration were obtained in an external solution containing the following (in

755 mM): 145 NaCl, 5 KCl, 10 HEPES, 10 Glucose, 2 CaCl<sub>2</sub>, 2 MgCl<sub>2</sub>, pH 7.3 with NaOH, osmolarity  
756 ~320mOsm. Series resistance ranged from 6-11MΩ and was compensated by 70-80%. To isolate  
757 whole-cell sodium currents during voltage clamp experiments, a modified external solution was  
758 applied containing the following (in mM): 15 NaCl, 130 TEA-Cl, 10 HEPES, 2 BaCl<sub>2</sub>, 13 glucose,  
759 0.03 CdCl<sub>2</sub>, pH 7.3 with NaOH, Osmolarity ~320mOsm. Voltage clamp recordings were performed  
760 at room temperature and current clamp recordings were conducted at 37°C. Bath temperature  
761 was controlled and monitored using CL-100 (Warner Instruments).

762

763 **Ex vivo electrophysiology.** The effect of the loss of Na<sub>v</sub>1.1 on muscle spindle afferent firing  
764 rates during muscle stretch and sinusoidal vibration was determined using an isolated muscle  
765 nerve preparation. The extensor digitorum longus muscle and innervating peroneal branch of the  
766 sciatic nerve were dissected from adult (2-4 month old) mice of both sexes. Muscles were held at  
767 optimal length (Lo), or the length of the muscle that maximal force of twitch contraction occurred.  
768 A series of nine 4 s ramp-and-hold stretches were given to 3 different stretch lengths repeated 3  
769 times each (2.5%, 5%, and 7.5% Lo; ramp speed 40% Lo/s). A series of twelve 9 s sinusoidal  
770 vibrations were given (25, 50, and 100 μm amplitude; 10, 25, 50, and 100 Hz frequency). A one-  
771 minute rest was given between each length change. Firing rates during a 10 s baseline before  
772 stretch (resting discharge or RD) and the maximal firing rate during the ramp up phase of stretch  
773 (dynamic peak or DP) were calculated for all animals. We determined whether the response to  
774 static stretch was maintained consistently throughout the 4s stretch, as well as the coefficient of  
775 variability of the interspike interval (ISI) during the plateau phase of stretch (CV = Std Dev/Mean  
776 of ISI over the time period of 1.5-3.5s after end of ramp up). Average firing rate during the 9 s of  
777 vibration and whether the unit could entrain in a 1:1 fashion to vibration was also determined.  
778 Detailed methods can be found in Wilkinson et al., 2012.

779



780 **Pharmacology.** ICA 121431 (#5066), 4,9-Anhydrotetrodotoxin (AH-TTX, #6159), and PF-  
781 05089771 (#5931) was purchased from Tocris Bioscience. Tetrodotoxin (TTX, ab120054) was  
782 purchased from abcam. All other chemicals were from Sigma-Aldrich and Fisher Chemical.

783

784 **Data acquisition and analysis.** Currents and voltages were acquired using pClamp software  
785 v11.2 (Molecular Devices). Recordings were obtained using an AxoPatch 200b patch-clamp  
786 amplifier and a Digidata 1550B and filtered at 5 kHz and digitized at 10 kHz. For biophysical  
787 analysis of whole-cell sodium currents, conductance (G) was calculated as  $G = I / (V - E_{Na})$ , in  
788 which  $I$  is the peak current,  $V$  is the voltage step, and  $E_{Na}$  is the reversal potential for sodium  
789 calculated from Nernst equation based on the intracellular and extracellular sodium  
790 concentrations in our recording solutions (10.38mV). Conductance data were normalized by the  
791 maximum conductance value,  $G_{max}$ , and data was fit with the Boltzmann equation: Fraction  
792 available = Minimum + ([Maximum-Minimum]/[1+exp((V- $V_{50}$ )/ $k$ )]), where  $V_{50}$  denotes the  
793 membrane potential at which half the channels are inactivated and  $k$  denotes the Boltzmann  
794 constant/slope factor. For voltage dependence of steady state inactivation, peak current data  
795 were normalized based on the maximum current,  $I_{max}$ . Analysis of action potential amplitude, full-  
796 width half max, and threshold were performed on the first action potential elicited in response to  
797 a 100 pA current injection (100 ms). Action potential threshold was calculated as the membrane  
798 potential at which the first derivative of the somatic membrane potential (dV/dT) reached 10 mV  
799 ms<sup>-1</sup> (Griffith et al., 2019; Kress et al., 2008). Tau values were calculated from 20 ms voltage  
800 steps from -90 mV to -30 mV and analyzed with single exponential curve fits. Voltage-clamp and  
801 current-clamp experiments were analyzed with Clampfit software v11.2 (Molecular Devices) and  
802 custom MatLab Scripts. *Ex vivo* recordings were obtained using an A-M Systems Model 1800  
803 extracellular amplifier with headstage and digitized using an ADInstruments PowerLab. Data was  
804 analyzed using ADInstruments LabChart software using the Spike Histogram function.

805

806 **Experimental design and statistical analysis.** Summary data are presented as mean  $\pm$  SEM,  
807 from  $n$  cells or afferents, or  $N$  animals. For quantitative analysis of *in situ* hybridization data, at  
808 least 3 biological replicates per condition were used and the investigator was blinded to genotype  
809 for analysis. Behavioral experiments and analysis were also performed genotype-blind. Statistical  
810 differences were determine using parametric tests for normally distributed data and non-  
811 parametric tests for data that did not conform to Gaussian distributions or had different variances.  
812 Statistical tests are listed in *Results* and/or figure legends. Statistical significance in each case is  
813 denoted as follows: \* $p < 0.05$ , \*\* $p < 0.01$ , \*\*\* $p < 0.001$ , and \*\*\*\* $p < 0.0001$ . Statistical tests and  
814 curve fits were performed using Prism 9.0 (GraphPad Software). All data generated or analyzed  
815 during this study are included in the manuscript and supporting file; Source Data files have been  
816 uploaded to Mendeley for all figures. Code has been uploaded to GitHub. A key resources table  
817 with specific organism and reagent information has been included in the method section.  
818

819 **REFERENCES**

- 820
- 821 Ahern CA, Payandeh J, Bosmans F, Chanda B. 2016. The hitchhiker's guide to the voltage-
- 822 gated sodium channel galaxy. *J Gen Physiol* **147**:1–24. doi:10.1085/jgp.201511492
- 823 Barbosa C, Tan Z-Y, Wang R, Xie W, Strong JA, Patel RR, Vasko MR, Zhang J-M, Cummins
- 824 TR. 2015. Nav $\beta$ 4 regulates fast resurgent sodium currents and excitability in sensory neurons.
- 825 *Mol Pain* **11**:60. doi:10.1186/s12990-015-0063-9
- 826 Bean BP. 2007. The action potential in mammalian central neurons. *Nat Rev Neurosci* **8**:451–
- 827 465. doi:10.1038/nrn2148
- 828 Bennett DL, Clark AJ, Huang J, Waxman SG, Dib-Hajj SD. 2019. The Role of Voltage-Gated
- 829 Sodium Channels in Pain Signaling. *Physiol Rev* **99**:1079–1151.
- 830 doi:10.1152/physrev.00052.2017
- 831 Bewick GS, Banks RW. 2015. Mechanotransduction in the muscle spindle. *Pflugers Arch*
- 832 **467**:175–190. doi:10.1007/s00424-014-1536-9
- 833 Bewick GS, Reid B, Richardson C, Banks RW. 2005. Autogenic modulation of mechanoreceptor
- 834 excitability by glutamate release from synaptic-like vesicles: evidence from the rat muscle
- 835 spindle primary sensory ending. *J Physiol* **562**:381–394. doi:10.1113/jphysiol.2004.074799
- 836 Carrasco DI, Vincent JA, Cope TC. 2017. Distribution of TTX-sensitive voltage-gated sodium
- 837 channels in primary sensory endings of mammalian muscle spindles. *J Neurophysiol* **117**:1690–
- 838 1701. doi:10.1152/jn.00889.2016
- 839 Catterall WA. 2017. Forty Years of Sodium Channels: Structure, Function, Pharmacology, and
- 840 Epilepsy. *Neurochem Res* **42**:2495–2504. doi:10.1007/s11064-017-2314-9

- 841 Claes L, Del-Favero J, Ceulemans B, Lagae L, Van Broeckhoven C, De Jonghe P. 2001. De  
842 novo mutations in the sodium-channel gene SCN1A cause severe myoclonic epilepsy of  
843 infancy. *Am J Hum Genet* **68**:1327–1332. doi:10.1086/320609
- 844 de Nooij JC, Doobar S, Jessell TM. 2013. Etv1 inactivation reveals proprioceptor subclasses  
845 that reflect the level of NT3 expression in muscle targets. *Neuron* **77**:1055–1068.  
846 doi:10.1016/j.neuron.2013.01.015
- 847 Denomme N, Lukowski AL, Hull JM, Jameson MB, Bouza AA, Narayan ARH, Isom LL. 2020.  
848 The voltage-gated sodium channel inhibitor, 4,9-anhydrotetrodotoxin, blocks human Nav1.1 in  
849 addition to Nav1.6. *Neurosci Lett* **724**:134853. doi:10.1016/j.neulet.2020.134853
- 850 Ding J, Li X, Tian H, Wang L, Guo B, Wang Y, Li W, Wang F, Sun T. 2021. SCN1A Mutation-  
851 Beyond Dravet Syndrome: A Systematic Review and Narrative Synthesis. *Front Neurol*  
852 **12**:743726. doi:10.3389/fneur.2021.743726
- 853 Escayg A, Goldin AL. 2010. Sodium channel SCN1A and epilepsy: mutations and mechanisms.  
854 *Epilepsia* **51**:1650–1658. doi:10.1111/j.1528-1167.2010.02640.x
- 855 Florez-Paz D, Bali KK, Kuner R, Gomis A. 2016. A critical role for Piezo2 channels in the  
856 mechanotransduction of mouse proprioceptive neurons. *Sci Rep* **6**:25923.  
857 doi:10.1038/srep25923
- 858 Fujiwara T, Sugawara T, Mazaki-Miyazaki E, Takahashi Y, Fukushima K, Watanabe M, Hara K,  
859 Morikawa T, Yagi K, Yamakawa K, Inoue Y. 2003. Mutations of sodium channel alpha subunit  
860 type 1 (SCN1A) in intractable childhood epilepsies with frequent generalized tonic-clonic  
861 seizures. *Brain J Neurol* **126**:531–546. doi:10.1093/brain/awg053

- 862 Fukuoka T, Kobayashi K, Yamanaka H, Obata K, Dai Y, Noguchi K. 2008. Comparative study of  
863 the distribution of the alpha-subunits of voltage-gated sodium channels in normal and  
864 axotomized rat dorsal root ganglion neurons. *J Comp Neurol* **510**:188–206.  
865 doi:10.1002/cne.21786
- 866 Griffith TN, Docter TA, Lumpkin EA. 2019. Tetrodotoxin-Sensitive Sodium Channels Mediate  
867 Action Potential Firing and Excitability in Menthol-Sensitive Vglut3-Lineage Sensory Neurons. *J*  
868 *Neurosci* **39**:7086–7101. doi:10.1523/JNEUROSCI.2817-18.2019
- 869 Herzog RI, Cummins TR, Ghassemi F, Dib-Hajj SD, Waxman SG. 2003. Distinct repriming and  
870 closed-state inactivation kinetics of Nav1.6 and Nav1.7 sodium channels in mouse spinal  
871 sensory neurons. *J Physiol* **551**:741–750. doi:10.1113/jphysiol.2003.047357
- 872 Ho C, O’Leary ME. 2011. Single-cell analysis of sodium channel expression in dorsal root  
873 ganglion neurons. *Mol Cell Neurosci* **46**:159–166. doi:10.1016/j.mcn.2010.08.017
- 874 Kalume F, Yu FH, Westenbroek RE, Scheuer T, Catterall WA. 2007. Reduced sodium current in  
875 Purkinje neurons from Nav1.1 mutant mice: implications for ataxia in severe myoclonic epilepsy  
876 in infancy. *J Neurosci* **27**:11065–11074. doi:10.1523/JNEUROSCI.2162-07.2007
- 877 Khaliq ZM, Gouwens NW, Raman IM. 2003. The contribution of resurgent sodium current to  
878 high-frequency firing in Purkinje neurons: an experimental and modeling study. *J Neurosci*  
879 **23**:4899–4912.
- 880 Kress GJ, Dowling MJ, Meeks JP, Mennerick S. 2008. High Threshold, Proximal Initiation, and  
881 Slow Conduction Velocity of Action Potentials in Dentate Granule Neuron Mossy Fibers. *J*  
882 *Neurophysiol* **100**:281–291. doi:10.1152/jn.90295.2008

- 883 Kupari J, Usoskin D, Parisien M, Lou D, Hu Y, Fatt M, Lönnerberg P, Spångberg M, Eriksson B,  
884 Barkas N, Kharchenko PV, Loré K, Khoury S, Diatchenko L, Ernfors P. 2021. Single cell  
885 transcriptomics of primate sensory neurons identifies cell types associated with chronic pain.  
886 *Nat Commun* **12**:1510. doi:10.1038/s41467-021-21725-z
- 887 Lin S-H, Cheng Y-R, Banks RW, Min M-Y, Bewick GS, Chen C-C. 2016. Evidence for the  
888 involvement of ASIC3 in sensory mechanotransduction in proprioceptors. *Nat Commun*  
889 **7**:11460. doi:10.1038/ncomms11460
- 890 Lossin C. 2009. A catalog of SCN1A variants. *Brain Dev* **31**:114–130.  
891 doi:10.1016/j.braindev.2008.07.011
- 892 MacDonald DI, Sikandar S, Weiss J, Pyrski M, Luiz AP, Millet Q, Emery EC, Mancini F, Iannetti  
893 GD, Alles SRA, Arcangeletti M, Zhao J, Cox JJ, Brownstone RM, Zufall F, Wood JN. 2021. A  
894 central mechanism of analgesia in mice and humans lacking the sodium channel NaV1.7.  
895 *Neuron* **109**:1497-1512.e6. doi:10.1016/j.neuron.2021.03.012
- 896 Madisen L, Zwingman TA, Sunkin SM, Oh SW, Zariwala HA, Gu H, Ng LL, Palmiter RD,  
897 Hawrylycz MJ, Jones AR, Lein ES, Zeng H. 2010. A robust and high-throughput Cre reporting  
898 and characterization system for the whole mouse brain. *Nat Neurosci* **13**:133–140.  
899 doi:10.1038/nn.2467
- 900 Mendelsohn AI, Simon CM, Abbott LF, Mentis GZ, Jessell TM. 2015. Activity Regulates the  
901 Incidence of Heteronymous Sensory-Motor Connections. *Neuron* **87**:111–123.  
902 doi:10.1016/j.neuron.2015.05.045
- 903 Mulley JC, Scheffer IE, Petrou S, Dibbens LM, Berkovic SF, Harkin LA. 2005. SCN1A mutations  
904 and epilepsy. *Hum Mutat* **25**:535–542. doi:10.1002/humu.20178

- 905 Nguyen MQ, von Buchholtz LJ, Reker AN, Ryba NJ, Davidson S. 2021. Single-nucleus  
906 transcriptomic analysis of human dorsal root ganglion neurons. *eLife* **10**:e71752.  
907 doi:10.7554/eLife.71752
- 908 Ogiwara I, Miyamoto H, Morita N, Atapour N, Mazaki E, Inoue I, Takeuchi T, Itohara S,  
909 Yanagawa Y, Obata K, Furuichi T, Hensch TK, Yamakawa K. 2007. Nav1.1 localizes to axons  
910 of parvalbumin-positive inhibitory interneurons: a circuit basis for epileptic seizures in mice  
911 carrying an Scn1a gene mutation. *J Neurosci* **27**:5903–5914. doi:10.1523/JNEUROSCI.5270-  
912 06.2007
- 913 Oliver KM, Florez-Paz DM, Badea TC, Mentis GZ, Menon V, de Nooij JC. 2021a. Molecular  
914 correlates of muscle spindle and Golgi tendon organ afferents. *Nat Commun* **12**:1451.  
915 doi:10.1038/s41467-021-21880-3
- 916 Oliver KM, Florez-Paz DM, Badea TC, Mentis GZ, Menon V, de Nooij JC. 2021b. Molecular  
917 correlates of muscle spindle and Golgi tendon organ afferents. *Nat Commun* **12**:1451.  
918 doi:10.1038/s41467-021-21880-3
- 919 Osteen JD, Herzig V, Gilchrist J, Emrick JJ, Zhang C, Wang X, Castro J, Garcia-Caraballo S,  
920 Grundy L, Rychkov GY, Weyer AD, Dekan Z, Undheim EAB, Alewood P, Stucky CL, Brierley  
921 SM, Basbaum AI, Bosmans F, King GF, Julius D. 2016. Selective spider toxins reveal a role for  
922 the Nav1.1 channel in mechanical pain. *Nature* **534**:494–499. doi:10.1038/nature17976
- 923 Patel RR, Barbosa C, Xiao Y, Cummins TR. 2015. Human Nav1.6 Channels Generate Larger  
924 Resurgent Currents than Human Nav1.1 Channels, but the Navβ4 Peptide Does Not Protect  
925 Either Isoform from Use-Dependent Reduction. *PloS One* **10**:e0133485.  
926 doi:10.1371/journal.pone.0133485

- 927 Pineda-Farias JB, Loeza-Alcocer E, Nagarajan V, Gold MS, Sekula RF. 2021. Mechanisms  
928 Underlying the Selective Therapeutic Efficacy of Carbamazepine for Attenuation of Trigeminal  
929 Nerve Injury Pain. *J Neurosci* **41**:8991–9007. doi:10.1523/JNEUROSCI.0547-21.2021
- 930 Salvatierra J, Castro J, Erickson A, Li Q, Braz J, Gilchrist J, Grundy L, Rychkov GY, Deiteren A,  
931 Rais R, King GF, Slusher BS, Basbaum A, Pasricha PJ, Brierley SM, Bosmans F. 2018. Nav1.1  
932 inhibition can reduce visceral hypersensitivity. *JCI Insight* **3**:121000.  
933 doi:10.1172/jci.insight.121000
- 934 Sharma N, Flaherty K, Lezgiyeva K, Wagner DE, Klein AM, Ginty DD. 2020. The emergence of  
935 transcriptional identity in somatosensory neurons. *Nature* **577**:392–398. doi:10.1038/s41586-  
936 019-1900-1
- 937 Than K, Kim E, Navarro C, Chu S, Klier N, Occiano A, Ortiz S, Salazar A, Valdespino SR,  
938 Villegas NK, Wilkinson KA. 2021. Vesicle-released glutamate is necessary to maintain muscle  
939 spindle afferent excitability but not dynamic sensitivity in adult mice. *J Physiol* **599**:2953–2967.  
940 doi:10.1113/JP281182
- 941 Usoskin D, Furlan A, Islam S, Abdo H, Lönnerberg P, Lou D, Hjerling-Leffler J, Haeggström J,  
942 Kharchenko O, Kharchenko PV, Linnarsson S, Ernfors P. 2015. Unbiased classification of  
943 sensory neuron types by large-scale single-cell RNA sequencing. *Nat Neurosci* **18**:145–153.  
944 doi:10.1038/nn.3881
- 945 Wang W, Atianjoh F, Gauda EB, Yaster M, Li Y, Tao Y-X. 2011. Increased expression of  
946 sodium channel subunit Nav1.1 in the injured dorsal root ganglion after peripheral nerve injury.  
947 *Anat Rec Hoboken NJ 2007* **294**:1406–1411. doi:10.1002/ar.21437



- 948 Wangzhou A, McIlvried LA, Paige C, Barragan-Iglesias P, Shiers S, Ahmad A, Guzman CA,  
949 Dussor G, Ray PR, Gereau RW, Price TJ. 2020. Pharmacological target-focused transcriptomic  
950 analysis of native vs cultured human and mouse dorsal root ganglia. *Pain* **161**:1497–1517.  
951 doi:10.1097/j.pain.0000000000001866
- 952 Wilkinson KA, Kloefkorn HE, Hochman S. 2012. Characterization of muscle spindle afferents in  
953 the adult mouse using an in vitro muscle-nerve preparation. *PloS One* **7**:e39140.  
954 doi:10.1371/journal.pone.0039140
- 955 Woo S-H, Lukacs V, de Nooij JC, Zaytseva D, Criddle CR, Francisco A, Jessell TM, Wilkinson  
956 KA, Patapoutian A. 2015. Piezo2 is the principal mechanotransduction channel for  
957 proprioception. *Nat Neurosci* **18**:1756–1762. doi:10.1038/nn.4162
- 958 Wu H, Petitpré C, Fontanet P, Sharma A, Bellardita C, Quadros RM, Jannig PR, Wang Y,  
959 Heimel JA, Cheung KKY, Wanderoy S, Xuan Y, Meletis K, Ruas J, Gurumurthy CB, Kiehn O,  
960 Hadjab S, Lallemand F. 2021. Distinct subtypes of proprioceptive dorsal root ganglion neurons  
961 regulate adaptive proprioception in mice. *Nat Commun* **12**:1026. doi:10.1038/s41467-021-  
962 21173-9
- 963 Yu FH, Mantegazza M, Westenbroek RE, Robbins CA, Kalume F, Burton KA, Spain WJ,  
964 McKnight GS, Scheuer T, Catterall WA. 2006. Reduced sodium current in GABAergic  
965 interneurons in a mouse model of severe myoclonic epilepsy in infancy. *Nat Neurosci* **9**:1142–  
966 1149. doi:10.1038/nn1754
- 967 Zheng Y, Liu P, Bai L, Trimmer JS, Bean BP, Ginty DD. 2019a. Deep Sequencing of  
968 Somatosensory Neurons Reveals Molecular Determinants of Intrinsic Physiological Properties.  
969 *Neuron* **103**:598-616.e7. doi:10.1016/j.neuron.2019.05.039

970 Zheng Y, Liu P, Bai L, Trimmer JS, Bean BP, Ginty DD. 2019b. Deep Sequencing of  
971 Somatosensory Neurons Reveals Molecular Determinants of Intrinsic Physiological Properties.  
972 *Neuron* **103**:598-616.e7. doi:10.1016/j.neuron.2019.05.039

973
